# Supplementary material for: Efficient synthesis of tetra- and penta-substituted benzenes via a domino annulation reaction of a pyridinium ylide and chalcone o-enolate
Source: Royal Society of Chemistry journal article supplement (doi:10.1039/d1nj03772b), 2021-01-01

## Efficient Synthesis of Tetra- and Penta-substituted Benzenes via Domino

### Annulation Reaction of pyridinium ylide and Chalcone *o*-Enolate

Feng-Shun Xu, Chen Yan, Jing Sun, Chao-Guo Yan\*

## Supporting Information

|                                                                              |             |
|------------------------------------------------------------------------------|-------------|
| <b>Table S1</b> The single crystal data of compounds <b>3a</b> and <b>3h</b> | <b>2</b>    |
| <b>Experimental section and characterization data</b>                        | <b>3</b>    |
| <b><sup>1</sup>H, <sup>13</sup>C and HRMS spectra for all compounds</b>      | <b>4-46</b> |

**Table S1 The single crystal data of compounds 3a and 3h**

| Phase                                                  | 3a                                                               | 3h                                                               |
|--------------------------------------------------------|------------------------------------------------------------------|------------------------------------------------------------------|
| Empirical formula                                      | C <sub>29</sub> H <sub>24</sub> O <sub>5</sub>                   | C <sub>28</sub> H <sub>21</sub> ClO <sub>5</sub>                 |
| Formula weight                                         | 452.48                                                           | 472.90                                                           |
| Temperature/K                                          | 296(2) K                                                         | 296(2) K                                                         |
| Wavelength/ Å                                          | 0.71073                                                          | 0.71073                                                          |
| Crystal system                                         | Monoclinic                                                       | Triclinic                                                        |
| Space group                                            | P-2(1)/n                                                         | P-1                                                              |
| <i>a</i> / Å                                           | 13.937(5)                                                        | 9.6420(9)                                                        |
| <i>b</i> / Å                                           | 11.056(3)                                                        | 9.6811(10)                                                       |
| <i>c</i> / Å                                           | 15.432(4)                                                        | 14.0972(13)                                                      |
| $\alpha$ (°)                                           | 90                                                               | 83.296(3)                                                        |
| $\beta$ (°)                                            | 94.595(10)                                                       | 76.282(3)                                                        |
| $\gamma$ (°)                                           | 90                                                               | 66.624(3)                                                        |
| <i>V</i> (Å <sup>3</sup> )                             | 2370.3(12)                                                       | 1173.1(2)                                                        |
| <i>Z</i>                                               | 4                                                                | 2                                                                |
| Calculated density (g·cm <sup>-3</sup> )               | 1.268                                                            | 1.339                                                            |
| Absorption coefficient(mm <sup>-1</sup> )              | 0.086                                                            | 0.200                                                            |
| <i>F</i> (000)                                         | 952                                                              | 492                                                              |
| $\theta$ range / (°)                                   | 2.354 to 26.000                                                  | 1.454 to 25.999                                                  |
| Limiting indices                                       | -17<= <i>h</i> <=16,<br>-12<= <i>k</i> <=13, -19<= <i>l</i> <=18 | -11<= <i>h</i> <=11,<br>-11<= <i>k</i> <=11, -16<= <i>l</i> <=17 |
| Reflections collected/unique                           | 21664 / 4644<br>[R(int) = 0.0595]                                | 16665 / 4586<br>[R(int) = 0.0307]                                |
| Completeness to theta                                  | 99.9 %                                                           | 99.7 %                                                           |
| Max. and min. transmission                             | 0.7456 and 0.6878                                                | 0.7456 and 0.6578                                                |
| Refinement method                                      | Full-matrix<br>least-squares on F <sup>2</sup>                   | Full-matrix<br>least-squares on F <sup>2</sup>                   |
| Data/restraints/parameters                             | 4644 / 0 / 311                                                   | 4586 / 0 / 315                                                   |
| Goodness-of-fit on <i>F</i> <sup>2</sup>               | 1.017                                                            | 1.014                                                            |
| Final <i>R</i> indices[ <i>I</i> >2σ( <i>I</i> )]      | R1 = 0.0550, wR2 = 0.1106                                        | R1 = 0.0420, wR2 = 0.0903                                        |
| <i>R</i> indices (all data)                            | R1 = 0.1317, wR2 = 0.1371                                        | R1 = 0.0720, wR2 = 0.1034                                        |
| Largest diff. peak and hole<br>/(e · Å <sup>-3</sup> ) | 0.201 and -0.184                                                 | 0.178 and -0.157                                                 |

## Experimental section

**1. General procedure for preparation of the tetra-substituted benzenes 3a-3l:** To a 50 mL round flask was added 1-phenacyl-4-(N,N-dimethylamino)pyridinium bromide (0.5 mmol), chalcone *o*-enolate (1.0 mmol), DMF (8.0 mL) and TMD (1.0 mmol). The mixture was stirred at 100 °C for twelve hours. After removing the solvent, the residue was subjected to column chromatography (300 ~ 400 mesh) with mixed petroleum ether and ethyl acetate (V/V = 15:1) as eluent to give the pure product for analysis.

**Methyl 6'-(2-hydroxybenzoyl)-4''-methoxy-4-methyl-[1,1':3',1''-terphenyl]-4'-carboxylate (3a):** White solid, 71%, m.p.143-145°C.; <sup>1</sup>H NMR (400 MHz, CDCl<sub>3</sub>) δ: 11.95 (s, 1H, OH), 7.91 (s, 1H, ArH), 7.51 (s, 1H, ArH), 7.43 ~ 7.39 (m, 1H, ArH), 7.36 ~ 7.32 (m, 3H, ArH), 7.21 (d, *J*=8.0Hz, 2H, ArH), 7.08 (d, *J*=8.4Hz, 2H, ArH), 6.99-6.95 (m, 3H, ArH), 6.75 (t, *J* = 8.0 Hz, 1H, ArH), 3.87 (s, 3H, OCH<sub>3</sub>), 3.71 (s, 3H, OCH<sub>3</sub>), 2.29 (s, 3H, CH<sub>3</sub>); <sup>13</sup>C NMR (101 MHz, CDCl<sub>3</sub>) δ: 202.9, 168.1, 162.9, 159.4, 144.2, 143.5, 138.1, 136.7, 135.9, 135.8, 133.4, 132.7, 132.5, 130.2, 129.6, 129.5, 129.4, 128.8, 128.5, 119.7, 118.9, 118.1, 113.7, 55.2, 52.2, 21.1; IR (KBr) ν: 3717, 3010, 1847, 1711, 1603, 1517, 1400, 1299, 1250, 841 cm<sup>-1</sup>; HRMS (ESI) Calcd. for C<sub>29</sub>H<sub>24</sub>O<sub>5</sub> ([M+ Na]<sup>+</sup>): 475.1516, Found: 475.1513.

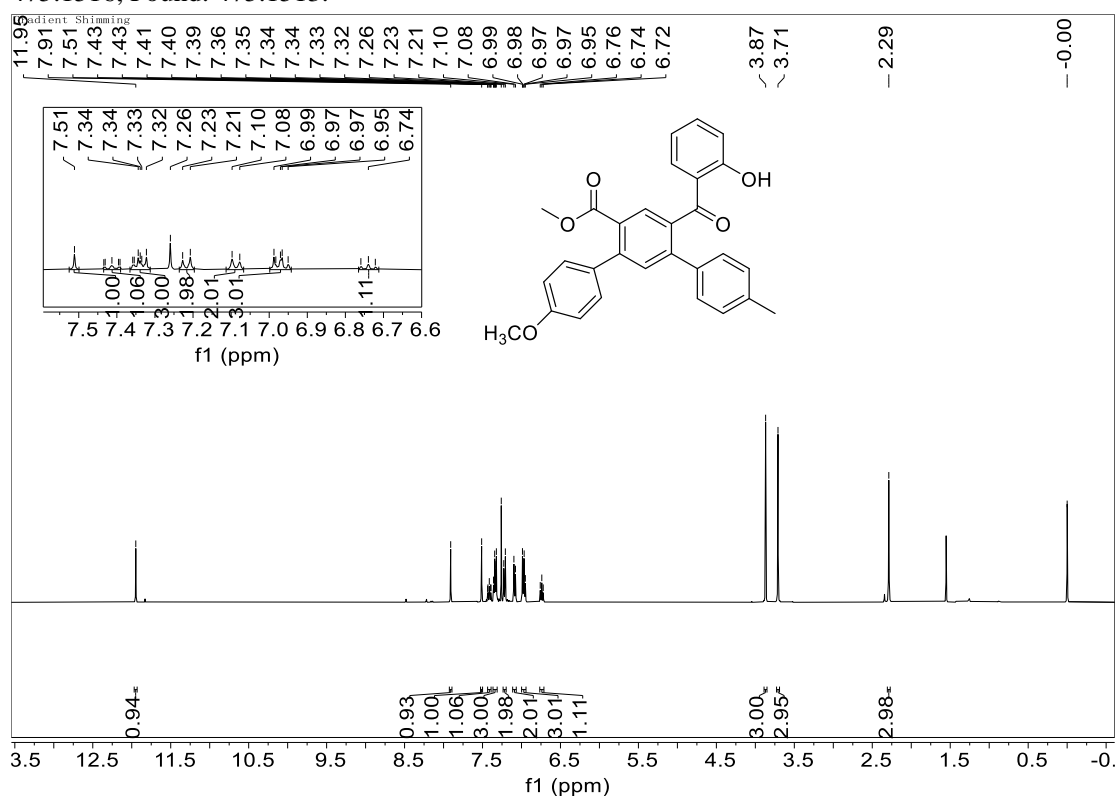

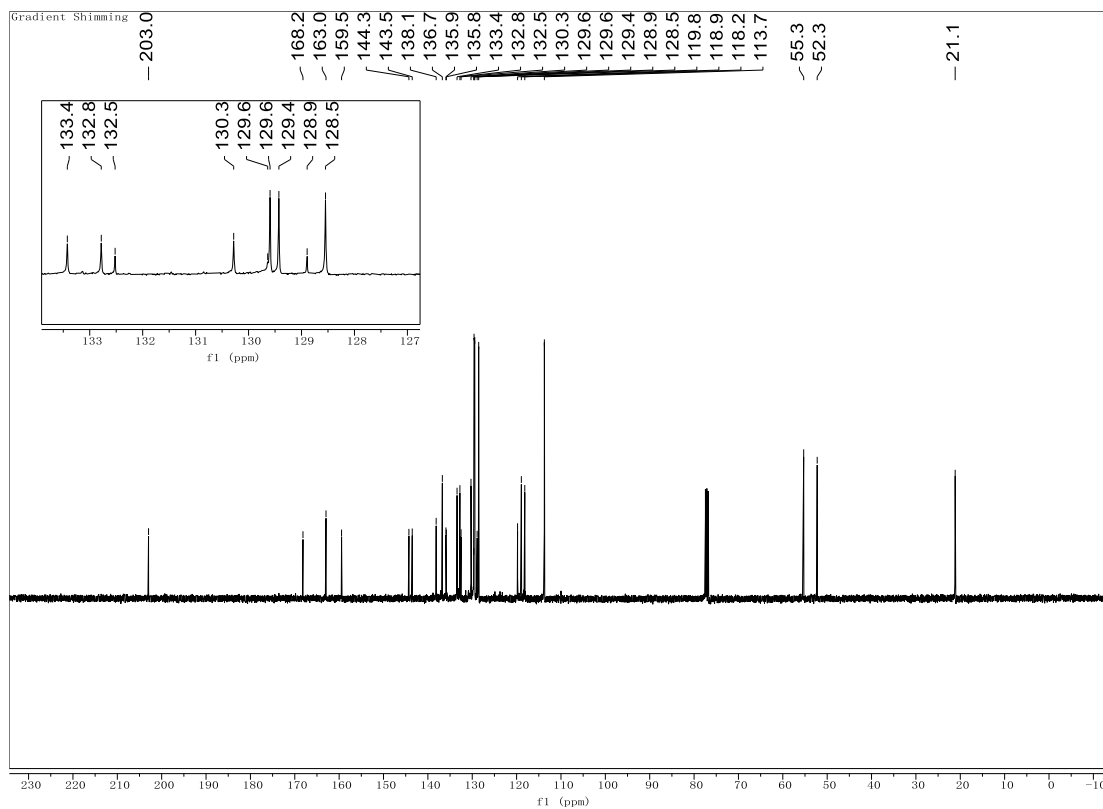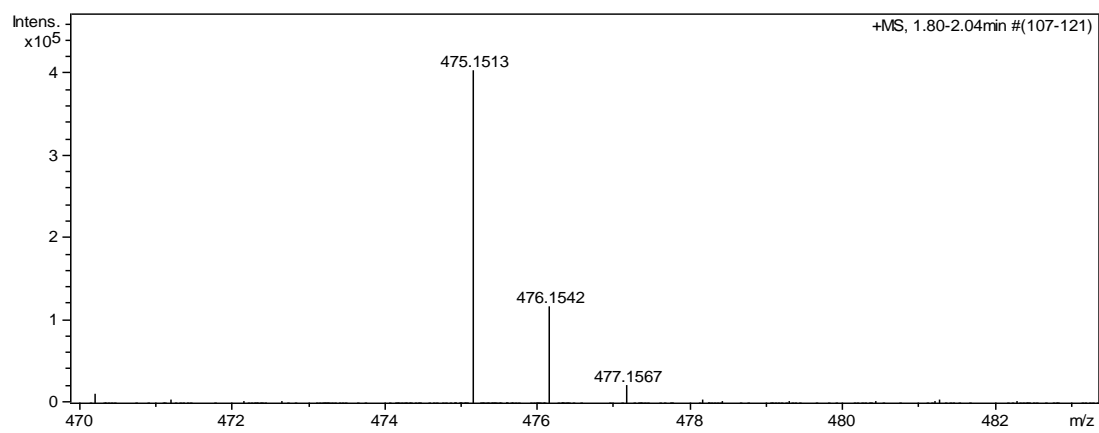

**Methyl 6'-(2-hydroxybenzoyl)-4''-methoxy-[1,1':3',1''-terphenyl]-4'-carboxylate (3b):** White, 65%, m.p. 139-141°C; <sup>1</sup>H NMR (400 MHz, CDCl<sub>3</sub>) δ: 11.92 (s, 1H, OH), 7.93 (s, 1H, ArH), 7.53 (m, 1H, ArH), 7.35-7.26 (m, 7H, ArH), 6.98(d, *J*=8.4Hz, 2H, ArH), 6.94(d, *J*=8.4Hz, 1H, ArH), 6.72 (t, *J*=7.6Hz, 1H, ArH), 3.87 (s, 3H, OCH<sub>3</sub>), 3.72 (s, 3H, OCH<sub>3</sub>); <sup>13</sup>C NMR (101 MHz, CDCl<sub>3</sub>) δ: 202.7, 168.1, 162.8, 159.4, 144.2, 143.4, 138.8, 136.7, 135.9, 133.3, 132.7, 132.4, 130.2, 129.5, 129.1, 128.8, 128.7, 128.6, 128.1, 119.7, 118.8, 118.1, 113.7, 55.2, 52.2 cm<sup>-1</sup>; IR (KBr) ν: 3717, 3012, 2755, 1846, 1718, 1601, 1516, 1400, 1337, 1301, 1242, 1109, 841 cm<sup>-1</sup>; HRMS (ESI) Calcd. for C<sub>28</sub>H<sub>22</sub>O<sub>5</sub> ([M+Na]<sup>+</sup>): 461.1359, Found: 461.1361.

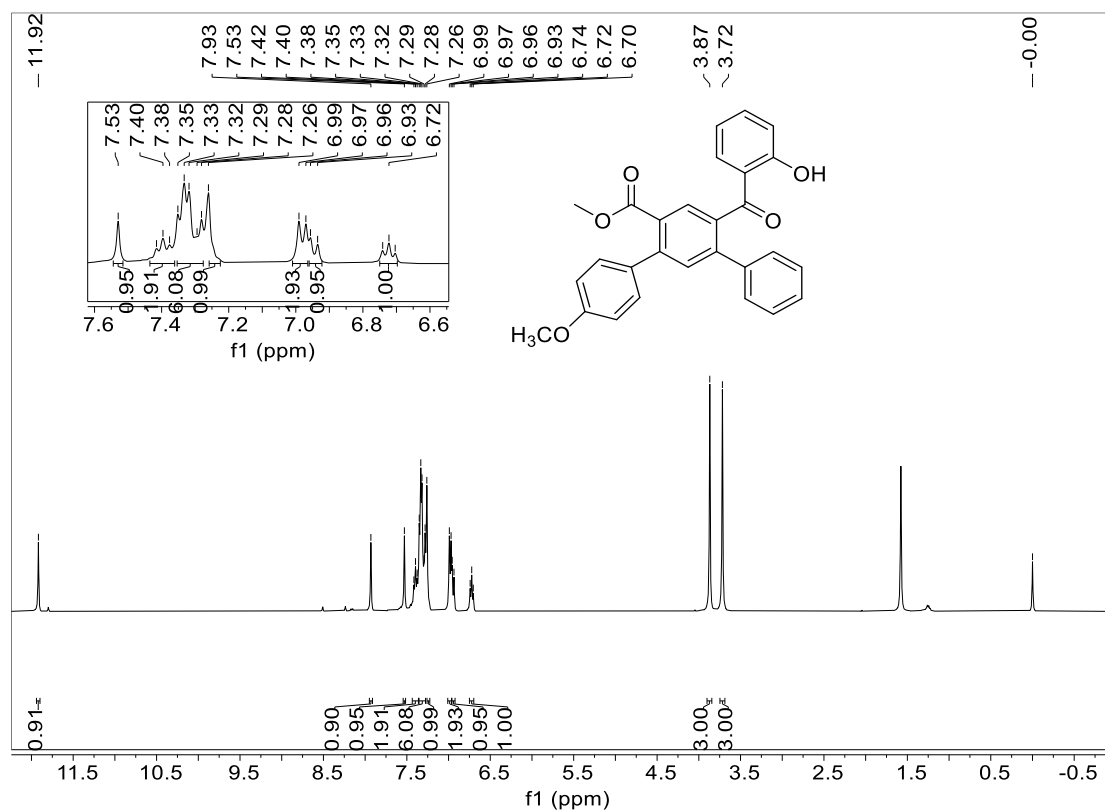

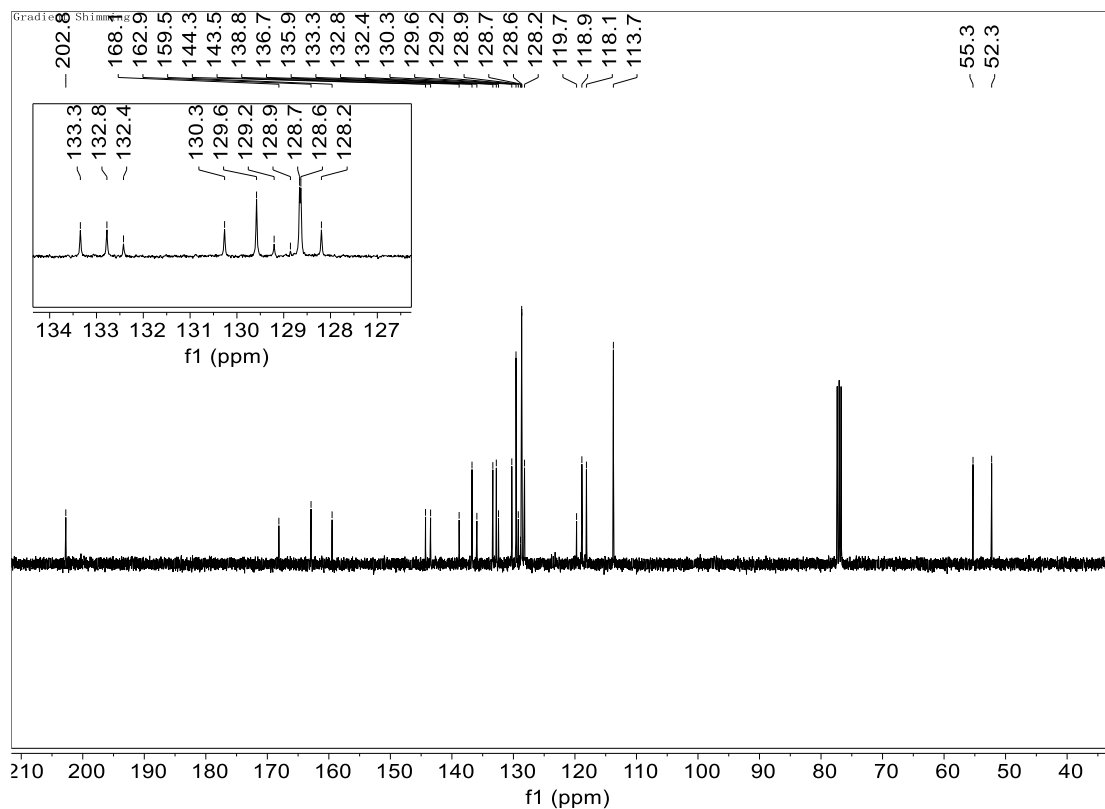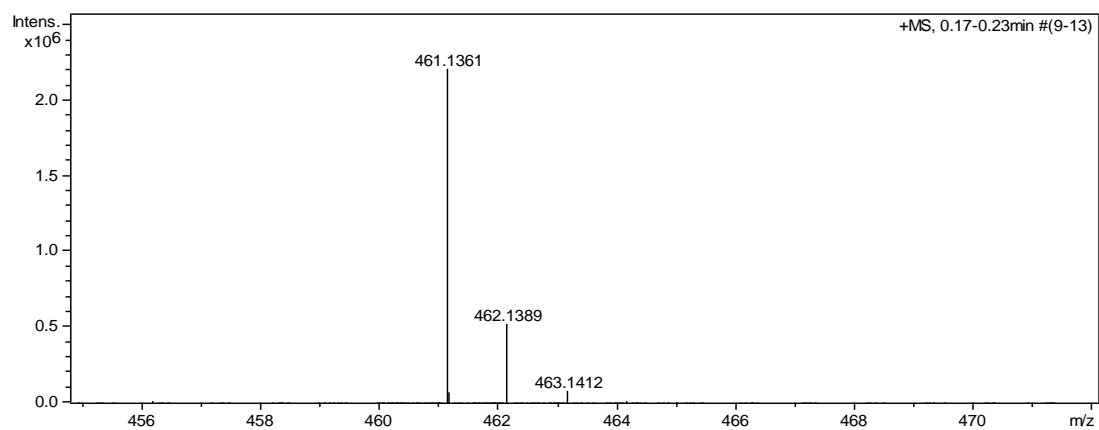

**Methyl 6'-(2-hydroxybenzoyl)-4''-methoxy-2-methyl-[1,1':3,1''-terphenyl]-4'-carboxylate**

**(3c):** White solid, 52%, m.p. 45-47°C; <sup>1</sup>H NMR (400 MHz, CDCl<sub>3</sub>) δ: 11.75 (s, 1H, OH), 7.92 (s, 1H, ArH), 7.42 (t, *J*=6.8 Hz, 3H, ArH), 7.33 (d, *J*=7.2 Hz, 2H, ArH), 7.15 (s, 1H, ArH), 7.07 (s, 1H, ArH), 6.97 (d, *J*=7.2 Hz, 2H, ArH), 6.94 (d, *J*=8.8 Hz, 1H, ArH), 6.80 (t, *J*=7.6 Hz, 1H, ArH), 6.80 (t, *J*=7.6 Hz, 1H, ArH), 3.86 (s, 3H, OCH), 3.73 (s, 3H, OCH<sub>3</sub>), 2.21 (s, 3H, CH<sub>3</sub>); <sup>13</sup>C NMR (101 MHz, CDCl<sub>3</sub>) δ: 202.8, 168.1, 162.8, 159.4, 144.2, 143.6, 138.7, 138.3, 136.6, 135.9, 133.2, 132.7, 132.4, 130.2, 129.5, 129.3, 129.0, 128.9, 128.4, 125.7, 119.7, 118.8, 118.0, 113.7, 109.9, 55.2, 52.2, 21.3; IR (KBr) ν: 3718, 3451, 3010, 1844, 1576, 1518, 1400, 1293, 1246, 1096, 841 cm<sup>-1</sup>; HRMS (ESI) Calcd. for C<sub>29</sub>H<sub>24</sub>O<sub>5</sub> ([M+ Na]<sup>+</sup>): 475.1516, Found: 475.1516.

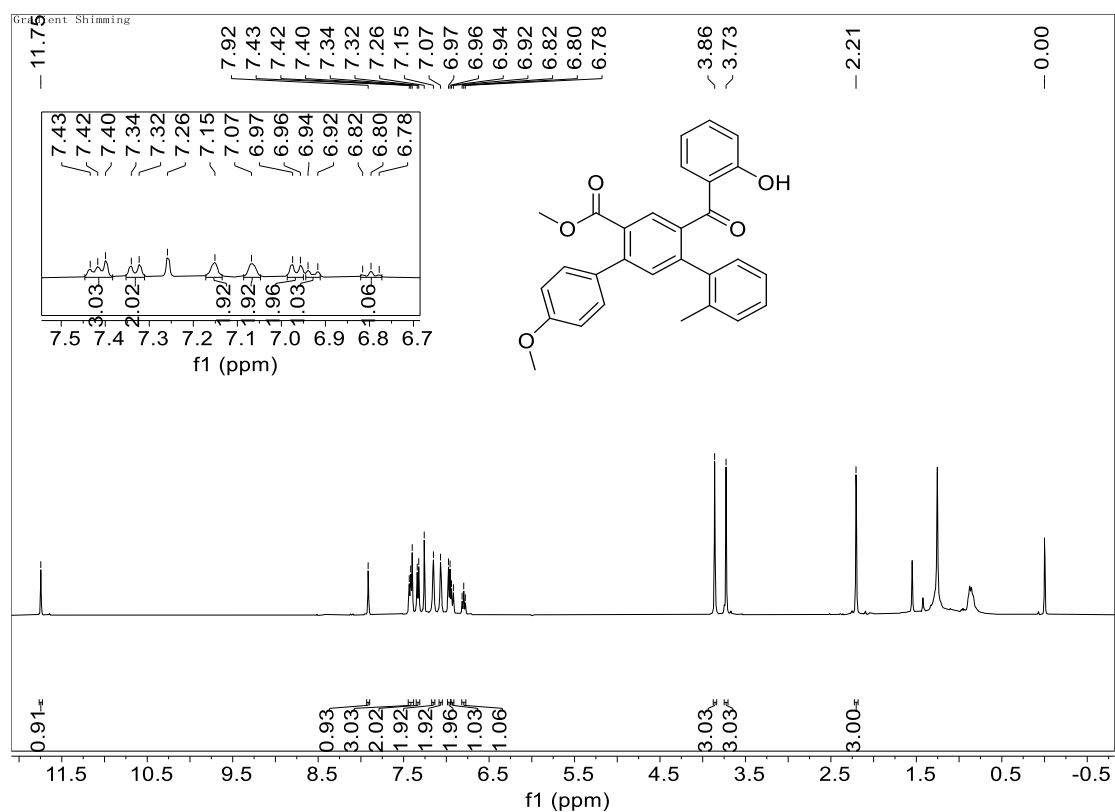

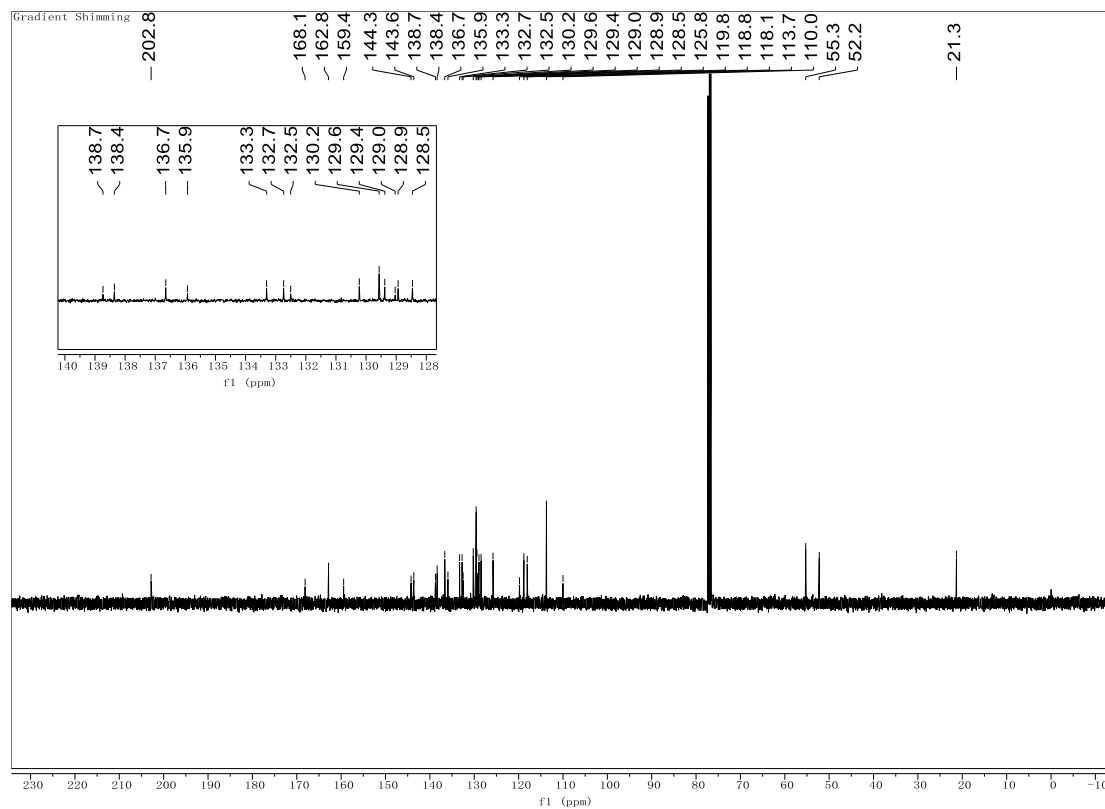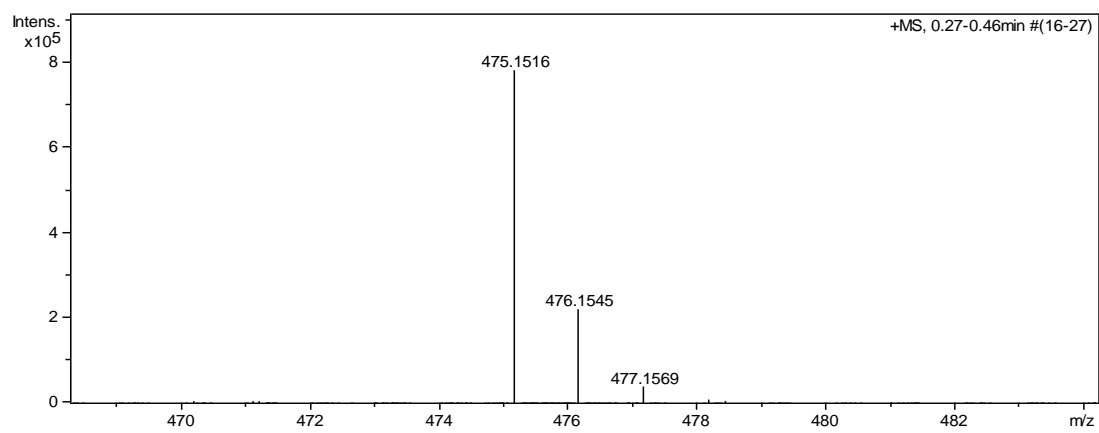



**Methyl 6'-(2-hydroxybenzoyl)-4''-methoxy-3-methyl-[1,1':3',1''-terphenyl]-4'-carboxylate**

**(3d):** White solid, 63%, m.p. 48-49°C;  $^1\text{H}$  NMR (400 MHz,  $\text{CDCl}_3$ )  $\delta$ : 11.90 (s, 1H, OH), 7.52 (s, 1H, ArH), 7.40 (t,  $J = 8.0$  Hz, 1H, NH), 7.35-7.32 (m, 3H, ArH), 7.16-7.13 (m, 2H, ArH), 7.10~7.05 (m, 2H, ArH), 7.00-6.94 (m, 3H, ArH), 6.73 (t,  $J = 7.2$  Hz, 1H, ArH), 3.87 (s, 3H,  $\text{OCH}_3$ ), 3.72 (s, 3H,  $\text{OCH}_3$ ), 2.28 (s, 3H,  $\text{CH}_3$ );  $^{13}\text{C}$  NMR (101 MHz,  $\text{CDCl}_3$ )  $\delta$ : 202.8, 168.1, 162.8, 159.4, 144.2, 143.6, 138.7, 138.3, 136.6, 135.9, 133.2, 132.7, 132.4, 130.2, 129.5, 129.3, 129.0, 128.9, 128.4, 125.7, 119.7, 118.8, 118.0, 113.7, 109.9, 55.2, 52.2, 21.3; IR (KBr)  $\nu$ : 3717, 3007, 2889, 2830, 1843, 1711, 1605, 1514, 1485, 1443, 1340, 1335, 1299, 1240, 1109, 830  $\text{cm}^{-1}$ ; HRMS (ESI) Calcd. for  $\text{C}_{29}\text{H}_{24}\text{O}_5$  ( $[\text{M} + \text{Na}]^+$ ): 475.1516, Found: 475.1514.

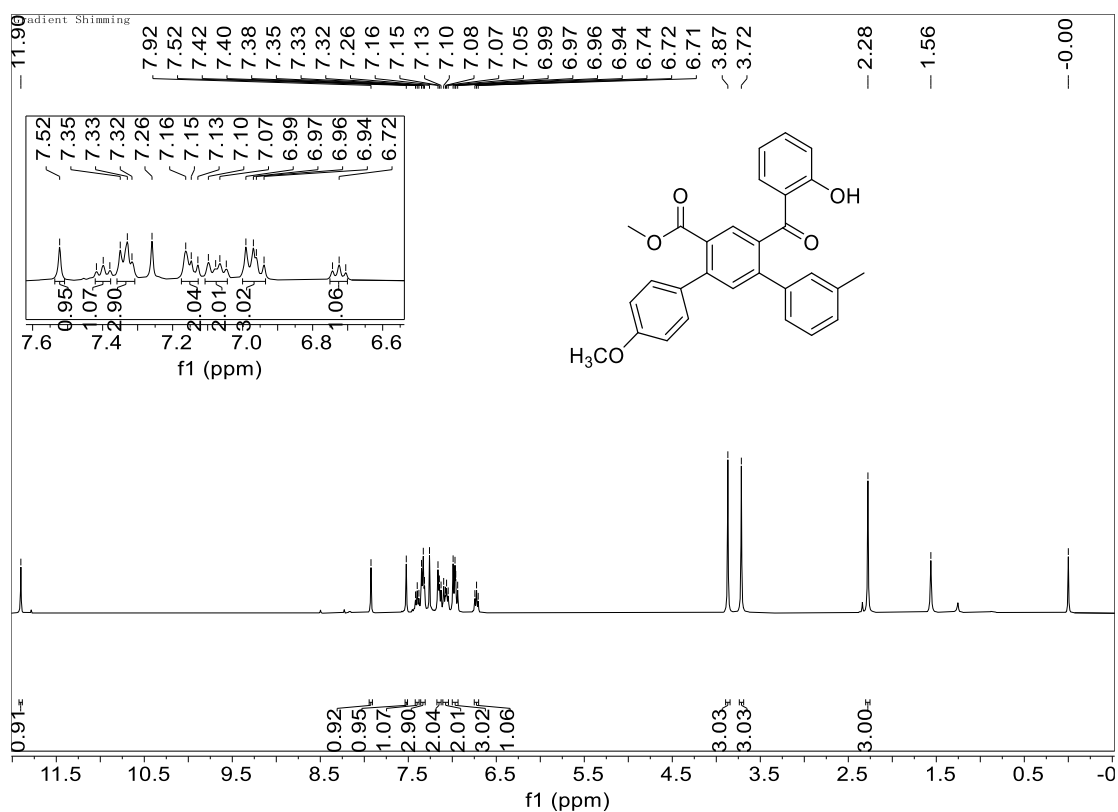

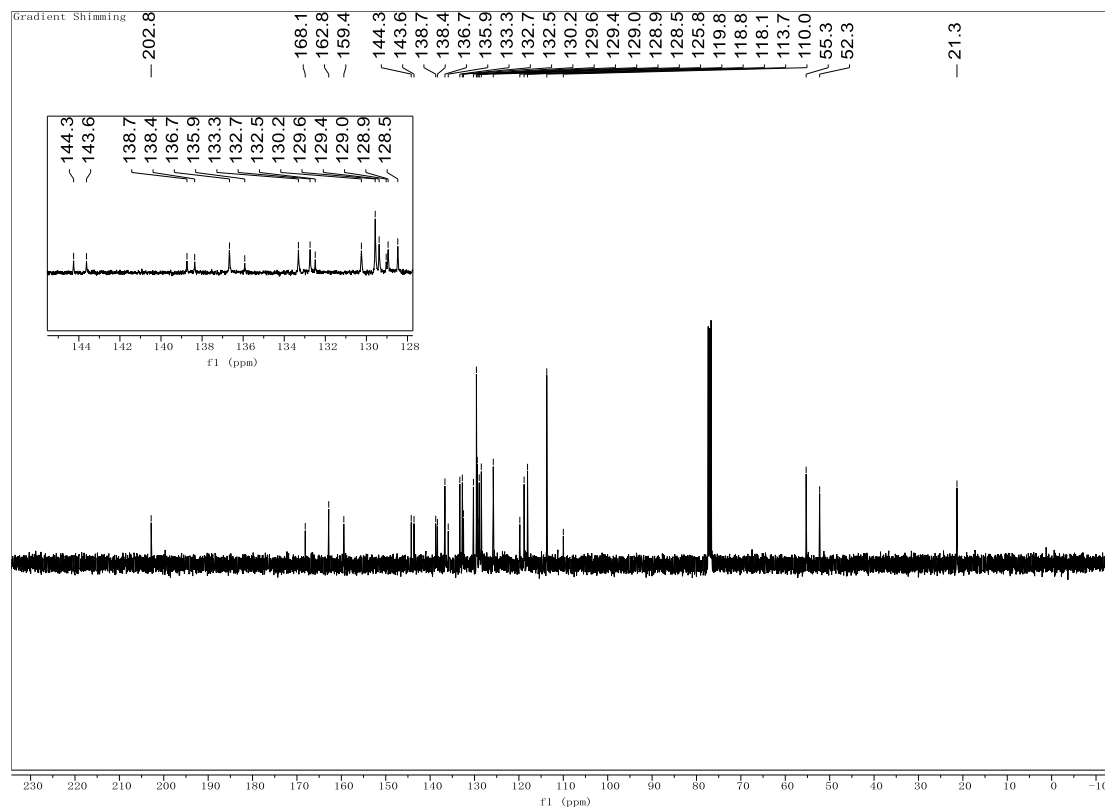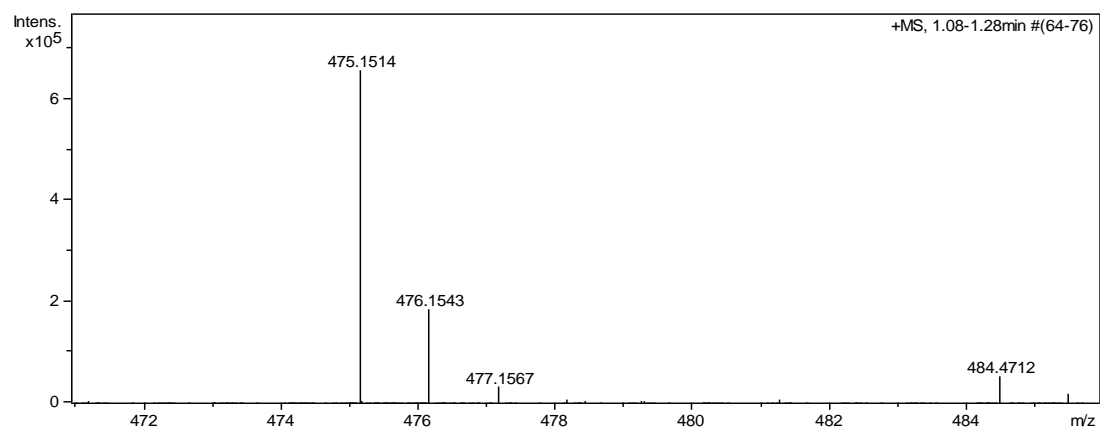

**Methyl 6'-(2-hydroxybenzoyl)-4,4''-dimethoxy-[1,1':3',1''-terphenyl]-4'-carboxylate (3e):**

White solid, 65%, m.p. 120-122°C; <sup>1</sup>H NMR (400 MHz, CDCl<sub>3</sub>) δ: 11.98 (s, 1H, OH), 7.91 (s, 1H, ArH), 7.50 (s, 1H, ArH), 7.41 (t, *J*=7.6Hz, 1H, ArH), 7.33 (t, *J*=8.4Hz, 3H, ArH), 7.27 ~ 7.25 (m, 2H, ArH), 6.97 (t, *J* = 8.4 Hz, 3H, ArH), 6.81 (d, *J* = 6.8 Hz, 2H, ArH), 6.71 (t, *J*=8.0Hz, 1H, ArH), 3.87 (s, 3H, OCH<sub>3</sub>), 3.75 (s, 3H, OCH<sub>3</sub>), 3.71 (s, 3H, OCH<sub>3</sub>); <sup>13</sup>C NMR (101 MHz, CDCl<sub>3</sub>) δ: 203.0, 168.0, 162.9, 159.5, 159.4, 144.2, 143.0, 136.7, 135.7, 133.3, 132.6, 132.5, 131.1, 130.2, 129.8, 129.5, 128.7, 119.7, 118.8, 118.1, 114.1, 113.7, 55.2, 55.2, 52.1; IR (KBr) ν: 3718, 3448, 3009, 1845, 1573, 1400, 1295, 1067, 841 cm<sup>-1</sup>; HRMS (ESI) Calcd. for C<sub>29</sub>H<sub>24</sub>O<sub>6</sub> ([M+Na]<sup>+</sup>): 491.1465, Found: 491.1465.

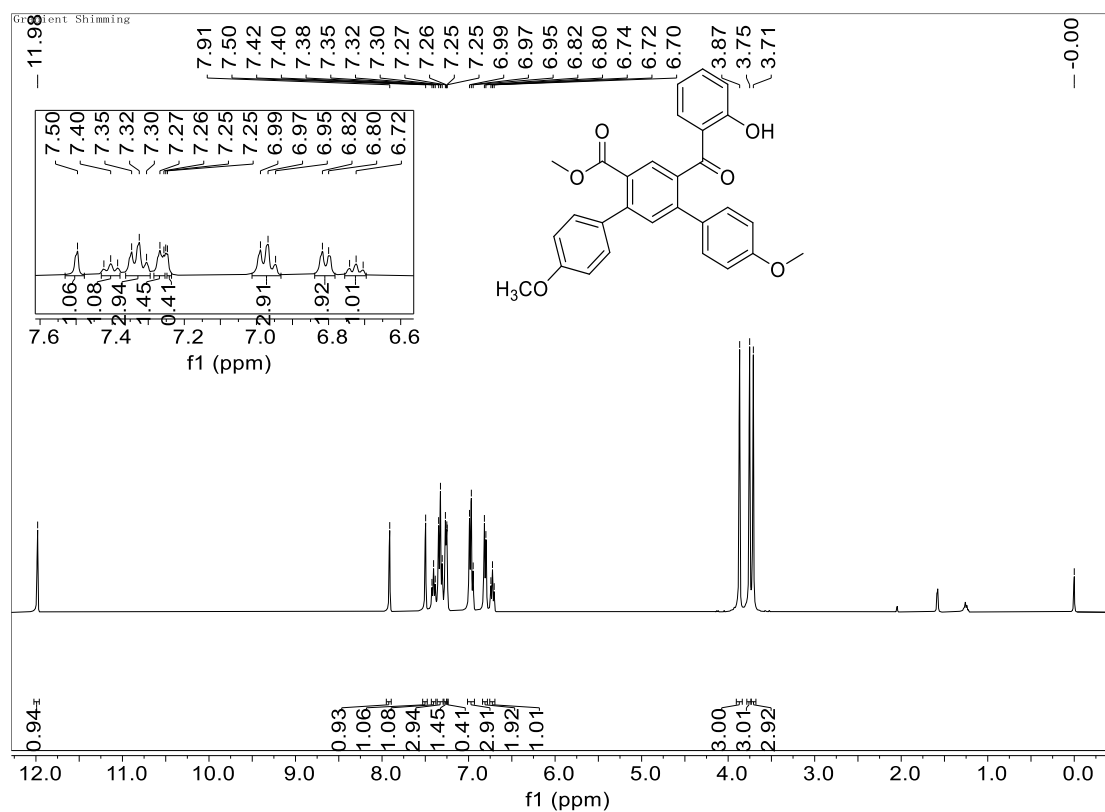

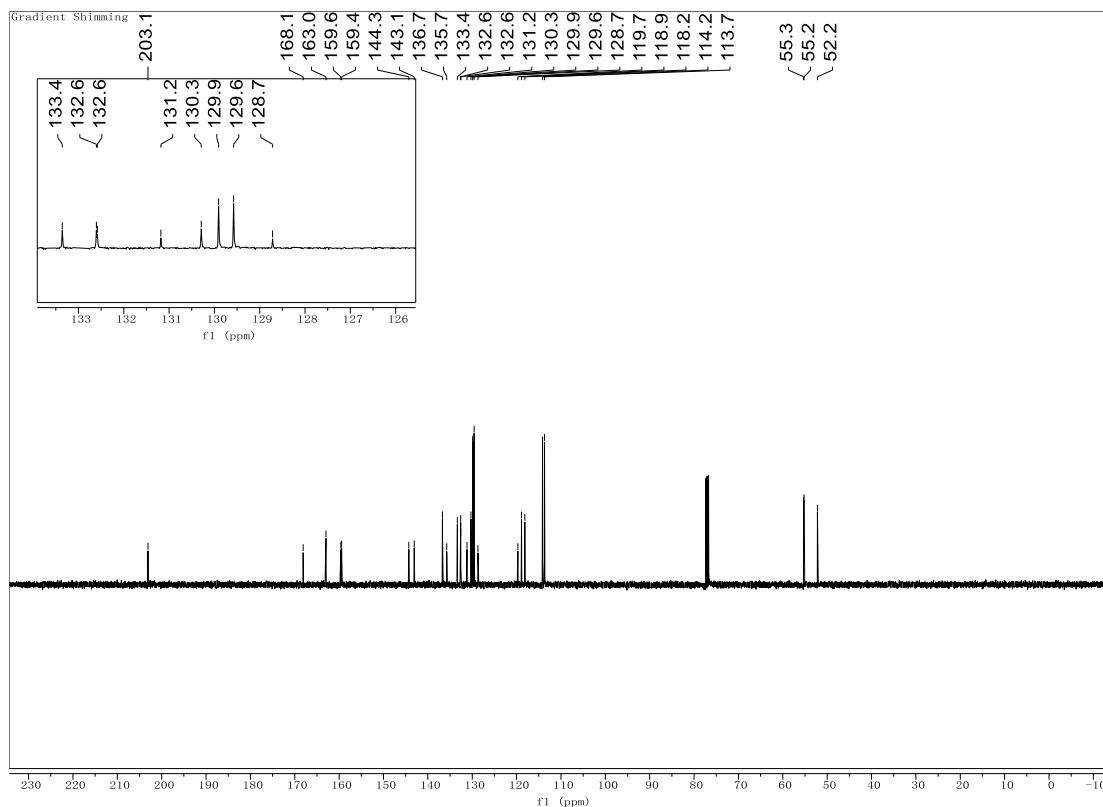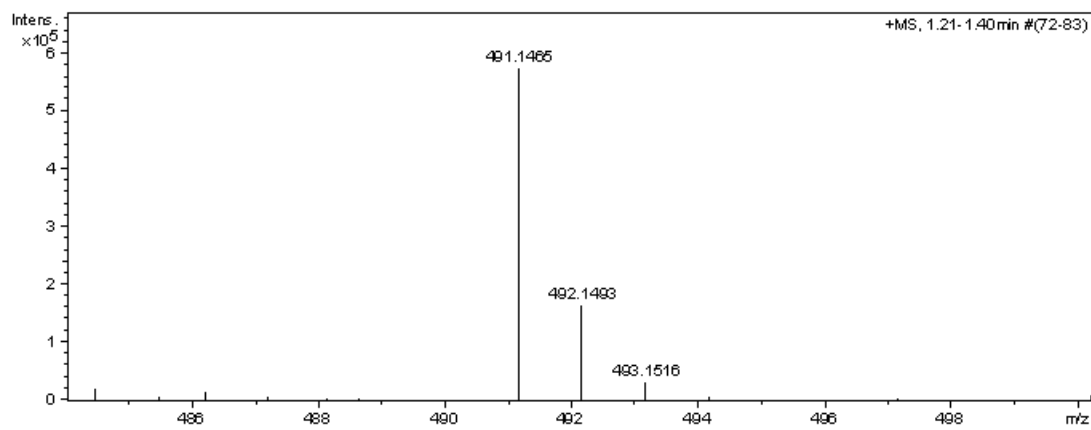

**Methyl 2-chloro-6'-(2-hydroxybenzoyl)-4''-methoxy-[1,1':3',1''-terphenyl]-4'-carboxylate (3f):**

White solid, 54%, m.p. 55 -57 °C; <sup>1</sup>H NMR (400 MHz, CDCl<sub>3</sub>) δ: 11.69 (s, 1H, OH), 7.95 (s, 1H, ArH), 7.51 (d, J = 8.0 Hz, 2H, ArH), 7.42 (t, J = 7.2 Hz, 1H, ArH), 7.36 ~ 7.31 (m, 3H, ArH), 7.25 ~ 7.24 (m, 1H, ArH), 7.23 ~ 7.20 (m, 2H, ArH), 6.97 (d, 2H, ArH), 6.93 (d, 1H, ArH); 6.81 (t, J = 7.2 Hz, 1H, ArH), 3.86 (s, 3H, OCH<sub>3</sub>), 3.73 (s, 3H, OCH<sub>3</sub>); <sup>13</sup>C NMR (101 MHz, CDCl<sub>3</sub>) δ: 201.2, 168.1, 162.7, 159.5, 143.7, 140.8, 137.4, 136.6, 136.4, 133.8, 133.5, 132.4, 132.1, 131.3, 130.2, 129.7, 129.6, 129.4, 126.6, 119.4, 118.7, 118.0, 113.7, 55.2, 52.3; IR (KBr) ν: 3718, 3448, 3009, 1845, 1573, 1400, 1295, 1067, 841 cm<sup>-1</sup> HRMS (ESI) Calcd. for C<sub>28</sub>H<sub>21</sub>ClO<sub>5</sub> ([M+Na]<sup>+</sup>): 495.0970, Found: 495.0964.

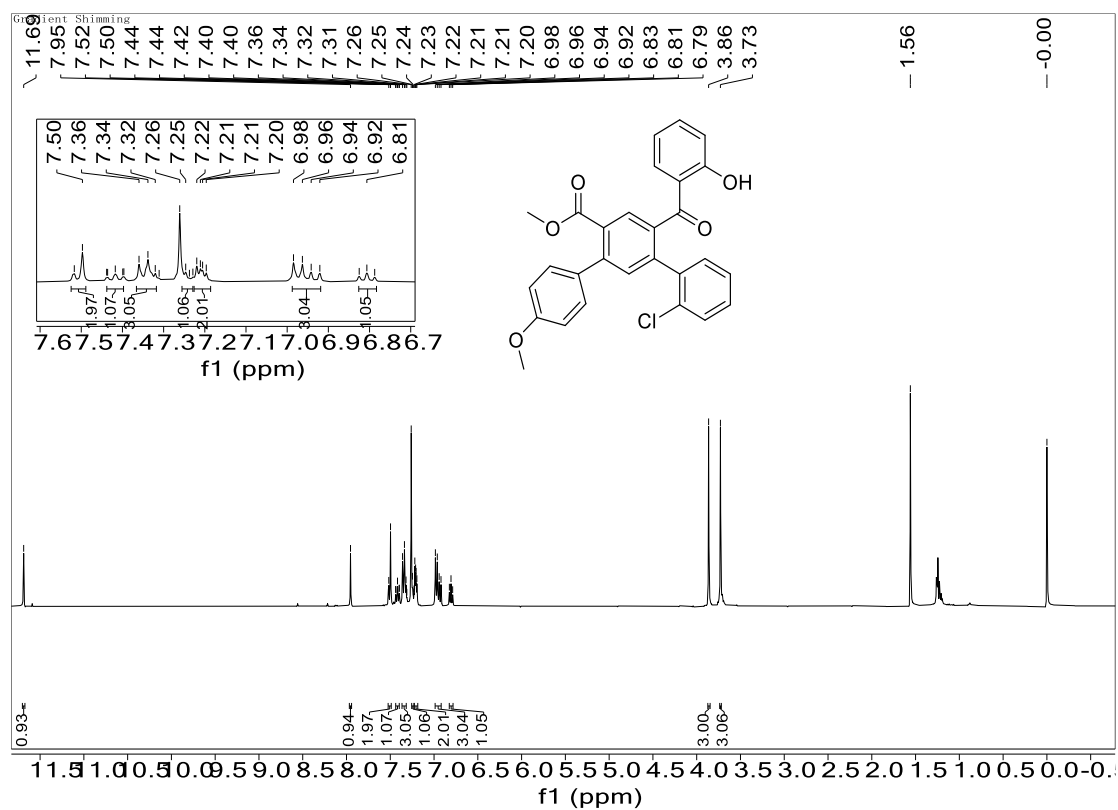

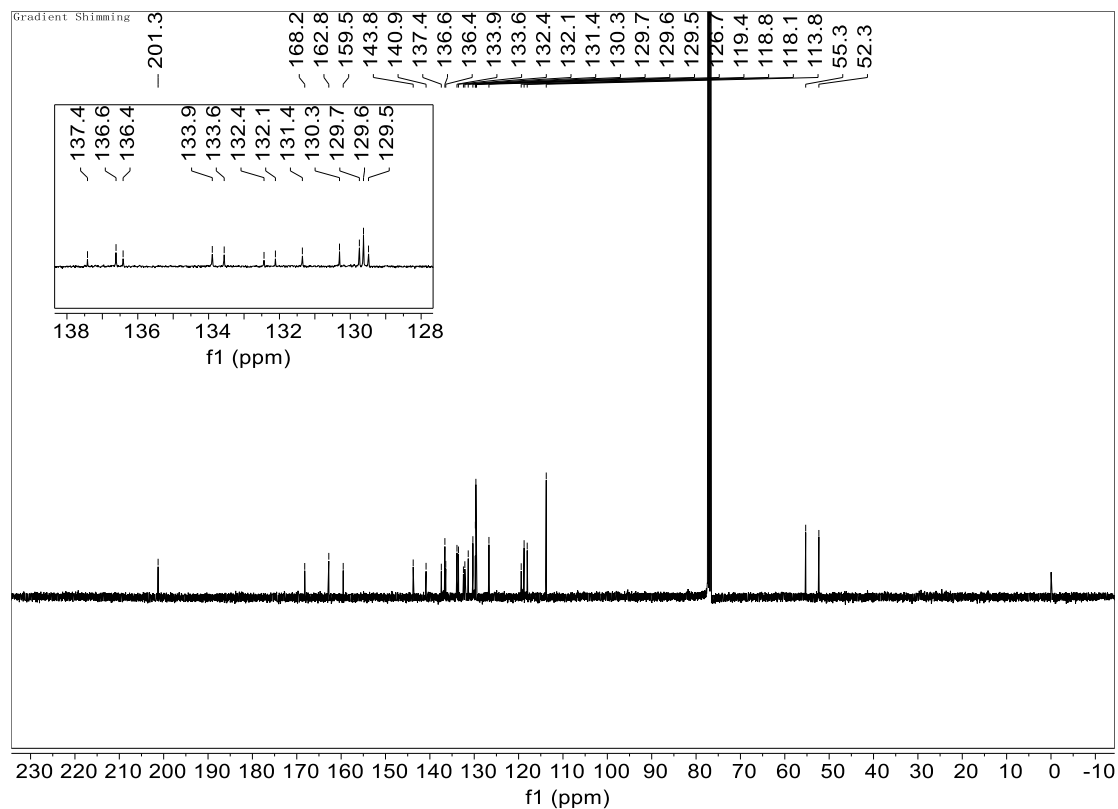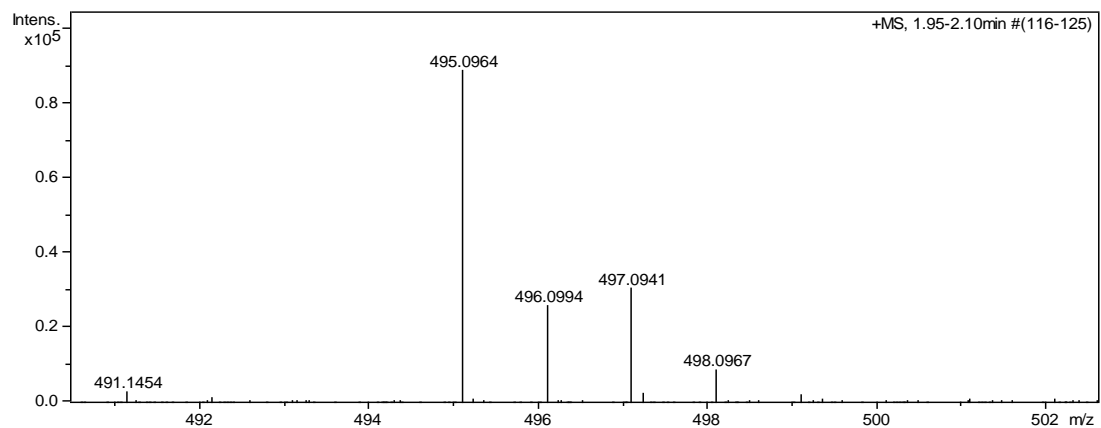

**Methyl 3-chloro-6'-(2-hydroxybenzoyl)-4''-methoxy-[1,1':3,1''-terphenyl]-4'-carboxylate**

**(3g):** White solid, 58%, m.p. 55-57 °C; <sup>1</sup>H NMR (400 MHz, CDCl<sub>3</sub>) δ: 11.85 (s, 1H, OH), 7.93 (s, 1H, ArH), 7.49 (s, 1H, ArH), 7.45 ~ 7.41 (m, 1H, ArH), 7.37 ~ 7.30 (m, 4H, ArH), 7.25 ~ 7.22 (m, 1H, ArH), 7.20 (d, *J* = 7.2 Hz, 1H, ArH), 7.17 ~ 7.15 (m, 1H, ArH), 6.70 ~ 6.96 (m, 3H, ArH), 6.76 (t, *J* = 7.6 Hz, 1H, ArH), 3.87 (s, 3H, OCH<sub>3</sub>), 3.72 (s, 3H, OCH<sub>3</sub>); <sup>13</sup>C NMR (101 MHz, CDCl<sub>3</sub>) δ: 202.1, 167.9, 162.9, 159.5, 144.3, 141.8, 140.5, 136.9, 135.8, 134.5, 133.1, 132.6, 132.1, 130.2, 129.7, 129.7, 129.5, 128.6, 128.6, 128.2, 126.9, 119.6, 118.9, 118.2, 113.7, 55.3, 52.3; IR (KBr) ν: 3716, 3455, 3020, 2892, 2835, 1737, 1607, 1571, 1400, 1243, 1107, 841 cm<sup>-1</sup>; HRMS (ESI) Calcd. for C<sub>28</sub>H<sub>21</sub>ClO<sub>5</sub> ([M+Na]<sup>+</sup>): 495.0975, Found: 495.0964.

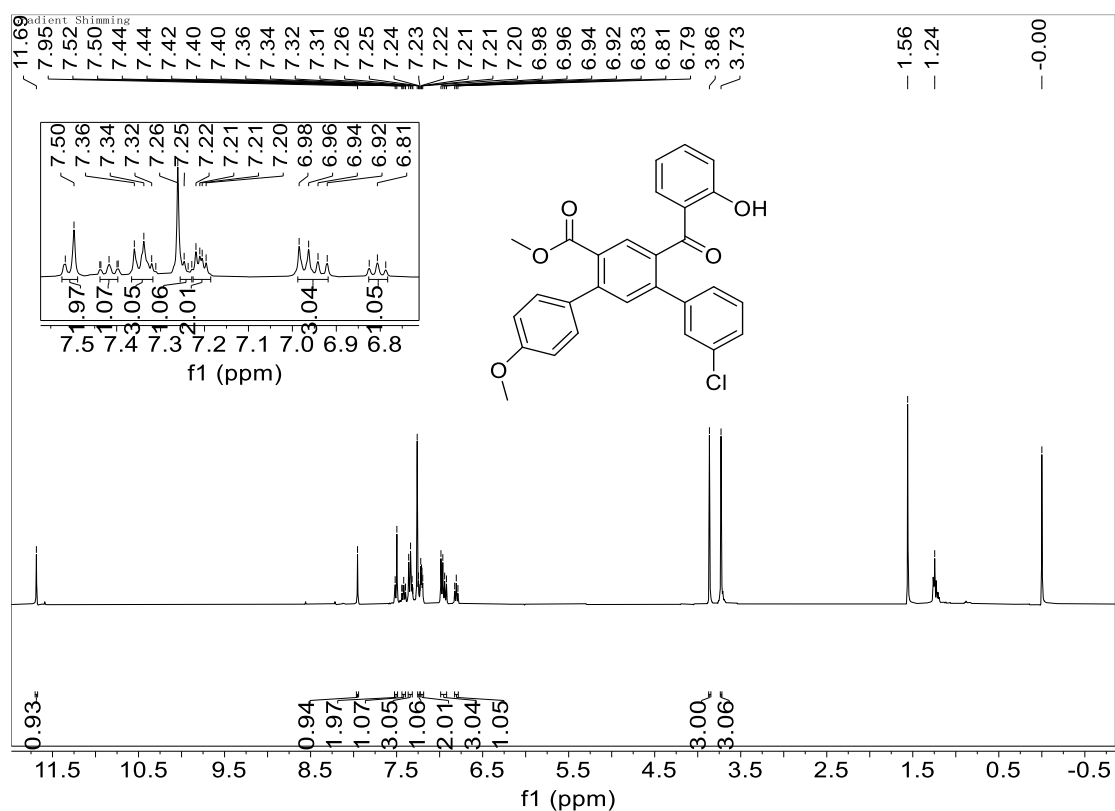

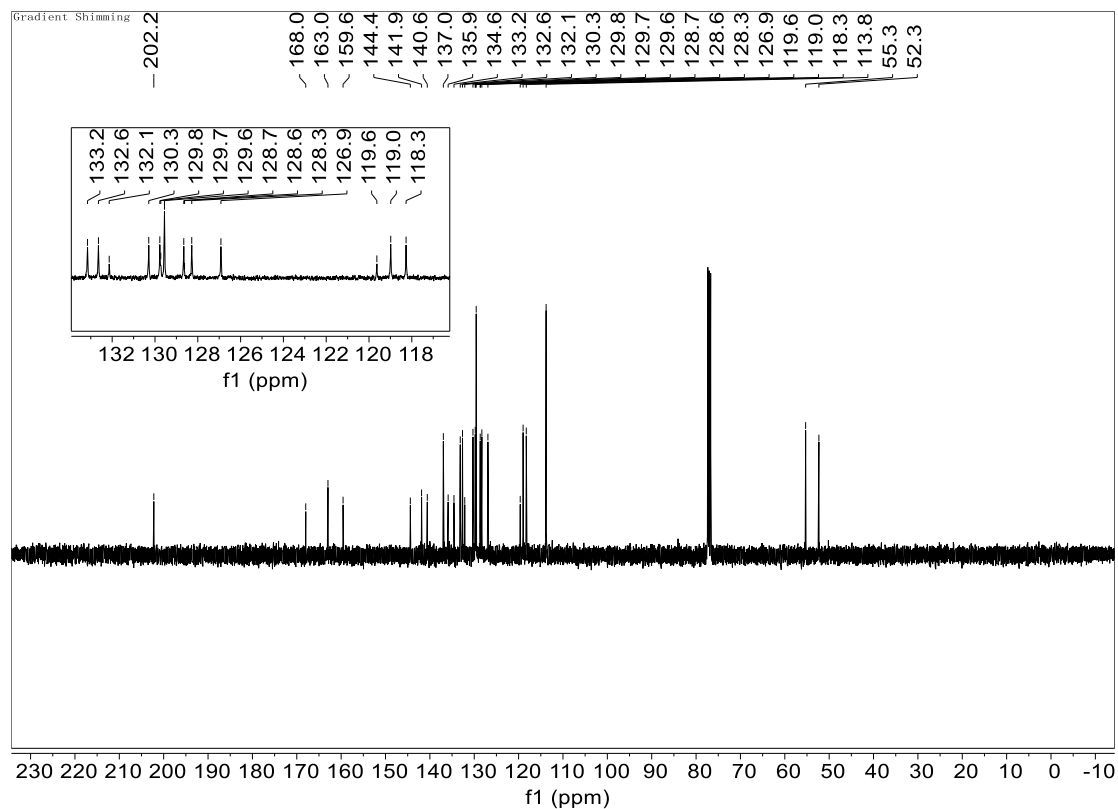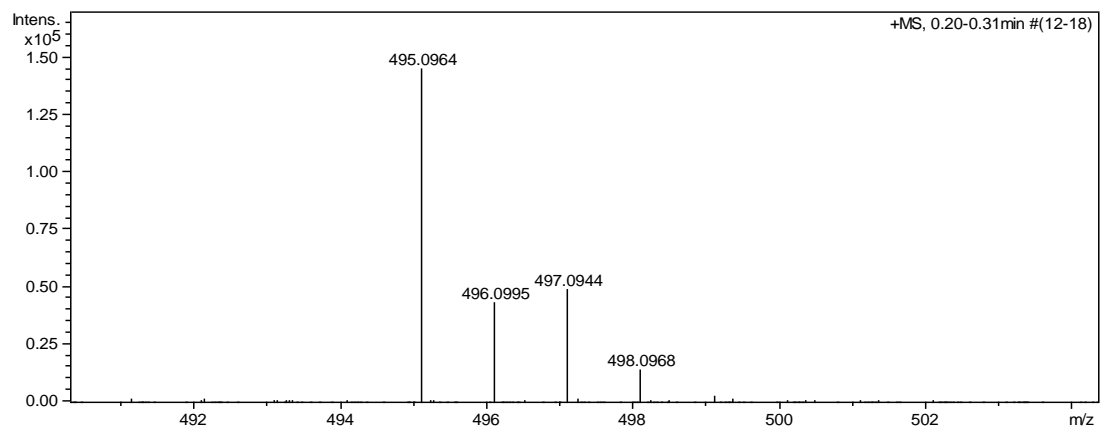



**Methyl 4-chloro-6'-(2-hydroxybenzoyl)-4''-methoxy-[1,1':3,1''-terphenyl]-4'-carboxylate**

**(3h):** White solid, 63%, m.p. 95-97 °C; <sup>1</sup>H NMR (400 MHz, CDCl<sub>3</sub>) δ: 11.88 (s, 1H, OH), 7.92 (s, 1H, ArH), 7.48 (s, 1H, ArH), 7.44 (t, *J* = 8.0 Hz, 1H, ArH), 7.34 ~ 7.31 (m, 3H, ArH), 7.26 (s, 4H, ArH), 6.98 (d, *J* = 8.4 Hz, 3H, ArH), 6.76 (d, *J* = 7.6 Hz, 1H, ArH), 3.87 (s, 3H, OCH<sub>3</sub>), 3.72 (s, 3H, OCH<sub>3</sub>); <sup>13</sup>C NMR (101 MHz, CDCl<sub>3</sub>) δ: 202.4, 167.9, 162.9, 159.5, 144.3, 142.1, 137.2, 136.9, 135.8, 134.4, 133.2, 132.6, 132.1, 130.2, 129.9, 129.5, 129.4, 128.8, 119.6, 119.0, 118.3, 113.7, 55.3, 52.3; IR (KBr) ν: 3717, 3452, 3029, 2888, 2833, 1738, 1603, 1518, 1479, 1442, 1310, 1285, 1240, 1186, 1093, 837, 758 cm<sup>-1</sup>; HRMS (ESI) Calcd. for C<sub>28</sub>H<sub>21</sub>ClO<sub>5</sub> ([M+Na]<sup>+</sup>): 495.0970, Found: 495.0963.

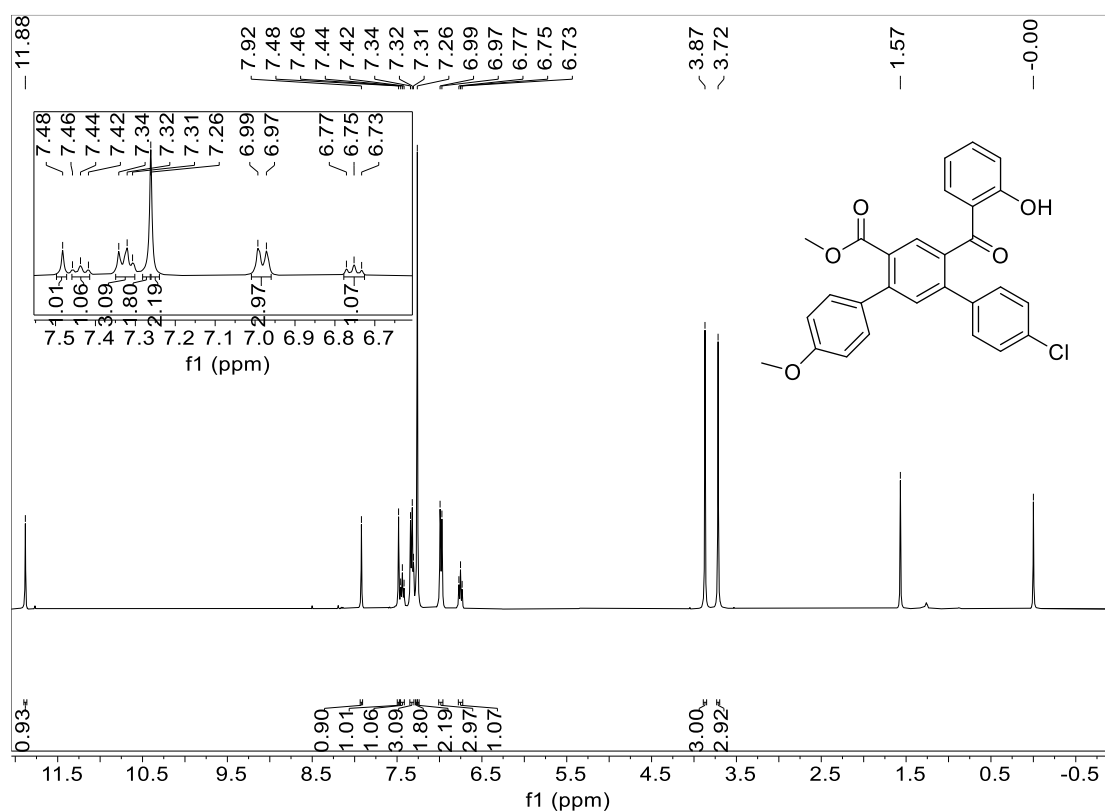

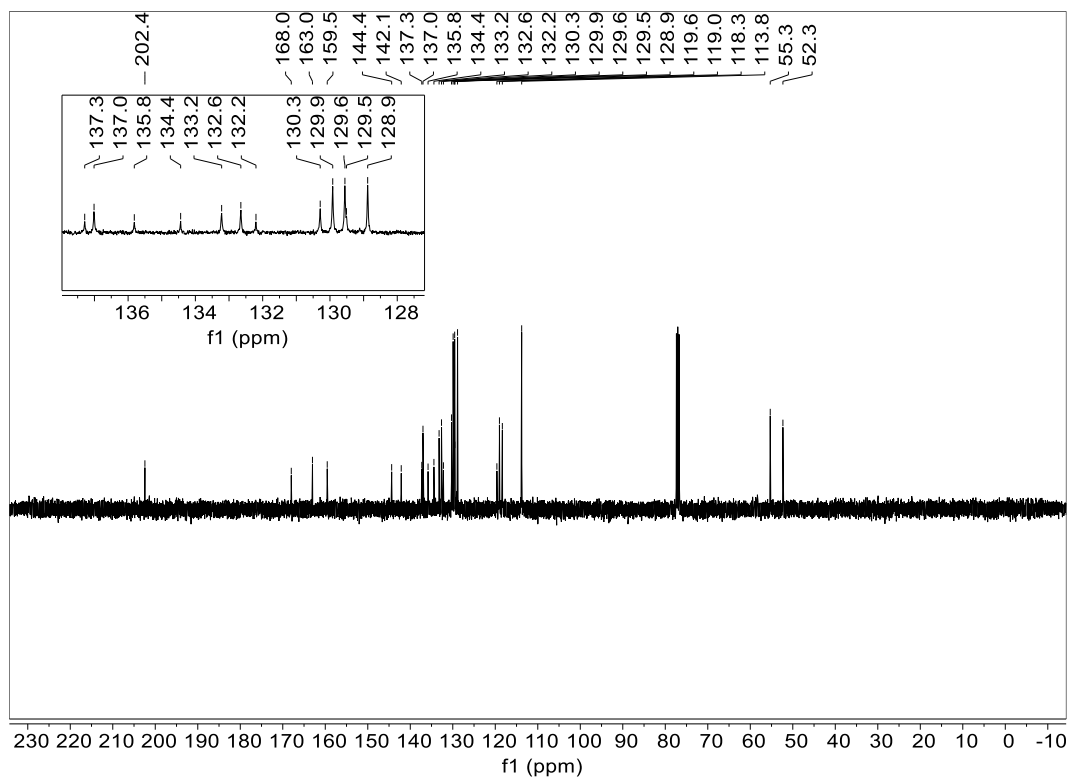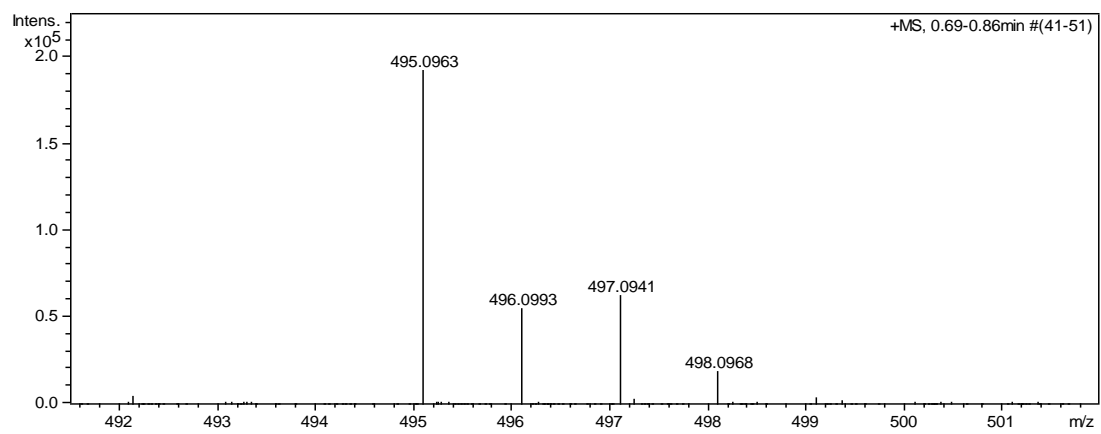

**Methyl 4-bromo-6'-(2-hydroxybenzoyl)-4''-methoxy-[1,1':3,1''-terphenyl]-4'-carboxylate**

**(3i):** White solid, 72%, m.p. 160 - 161 °C; <sup>1</sup>H NMR (400 MHz, CDCl<sub>3</sub>) δ: 11.87 (s, 1H, OH), 7.91 (s, 1H, ArH), 7.51 ~ 7.46 (m, 2H, ArH), 7.44 ~ 7.41 (m, 3H, ArH), 7.34 ~ 7.30 (m, *J* = 8.4 Hz, 3H, ArH), 7.19 (d, *J* = 8.4 Hz, 2H, ArH), 6.98 (d, *J* = 8.0 Hz, 3H, ArH), 6.77 ~ 6.73 (m, 1H, ArH), 3.87 (s, 3H, OCH<sub>3</sub>), 3.71 (s, 3H, OCH<sub>3</sub>); <sup>13</sup>C NMR (101 MHz, CDCl<sub>3</sub>) δ: 202.3, 167.9, 163.0, 159.5, 144.3, 142.1, 137.7, 136.9, 135.7, 133.1, 132.5, 132.1, 132.0, 131.8, 130.2, 130.1, 130.1, 129.5, 129.5, 124.9, 122.6, 119.6, 119.0, 118.3, 113.7, 55.3, 52.3; IR (KBr) ν: 3645, 3027, 2945, 2835, 1735, 1606, 1518, 1477, 1238, 1184, 1105, 833, 758, 611 cm<sup>-1</sup>; HRMS (ESI) Calcd. for C<sub>28</sub>H<sub>21</sub>BrO<sub>5</sub> ([M+Na]<sup>+</sup>): 539.0645, Found: 539.0460.

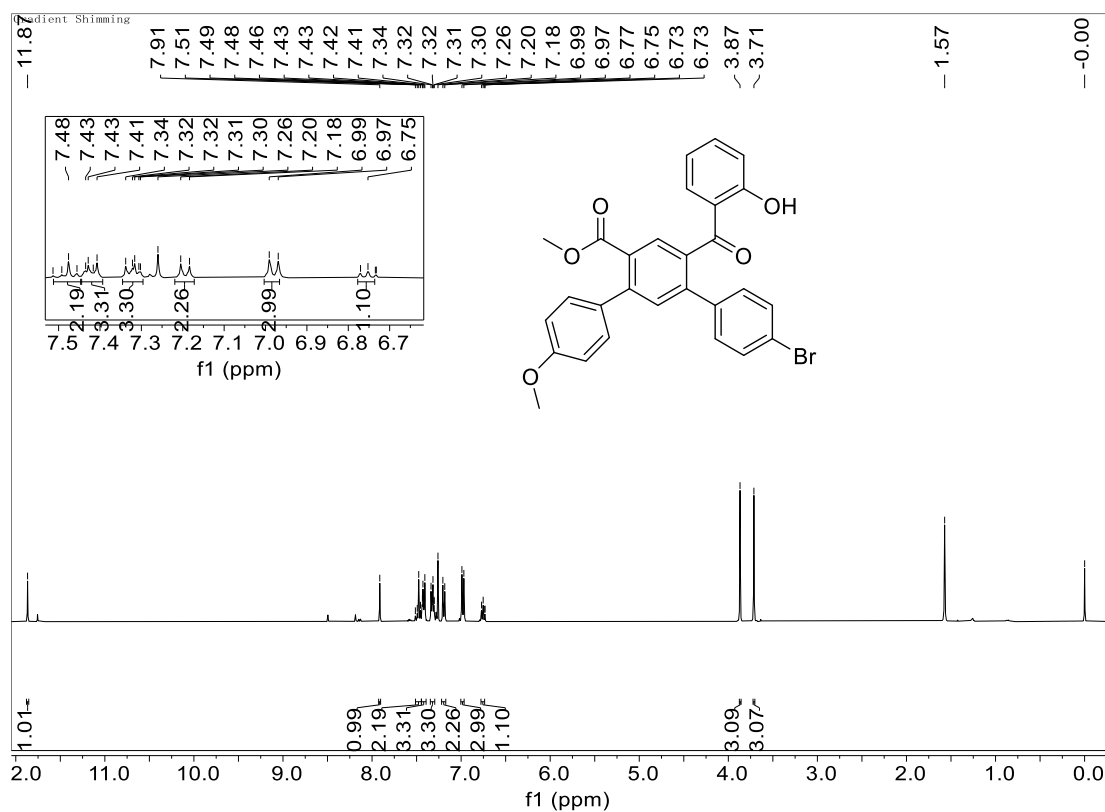

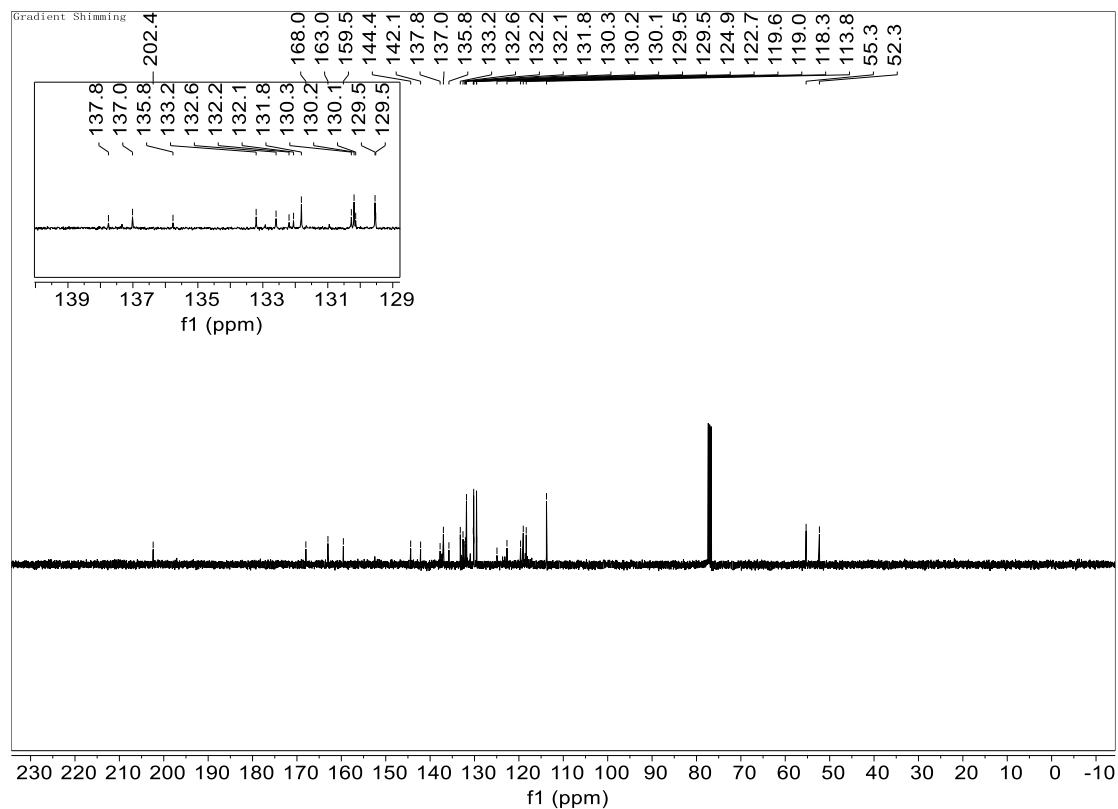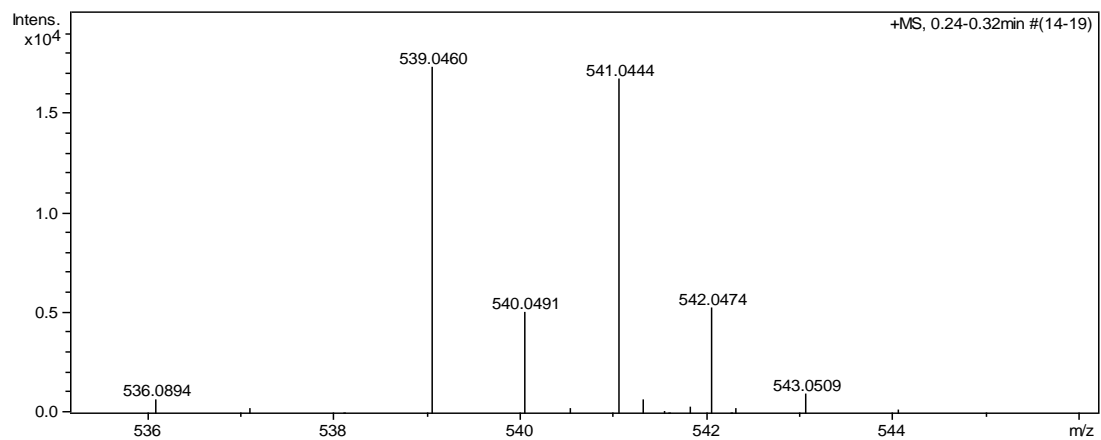

**Methyl 6'-(2-hydroxybenzoyl)-4-methoxy-[1,1':3',1''-terphenyl]-4'-carboxylate (3j):** White solid, 68%, m.p. 143-145°C; <sup>1</sup>H NMR (400 MHz, CDCl<sub>3</sub>) δ: 11.97(s, 1H, OH), 7.95 (s, 1H, ArH), 7.51 (s, 1H, ArH), 7.46 ~ 7.39 (m, 6H, ArH), 7.31 (d, *J*=8.0Hz, 1H, ArH), 7.27 ~ 7.26 (m, 2H, ArH), 6.96 (d, *J*=8.4Hz, 1H, ArH), 6.81 (d, *J*=8.4Hz, 2H, ArH), 6.73 (t, *J*=7.6Hz, 1H, ArH), 3.75 (s, 3H, OCH<sub>3</sub>), 3.68 (s, 3H, CH<sub>3</sub>); <sup>13</sup>C NMR (101 MHz, CDCl<sub>3</sub>) δ: 203.0, 167.8, 162.9, 159.6, 144.7, 143.1, 140.3, 136.7, 136.1, 133.3, 132.6, 131.0, 130.2, 129.9, 128.7, 128.3, 128.1, 127.7, 119.6, 118.9, 118.1, 114.1, 55.2, 52.1.; IR (KBr) ν: 3717, 3006, 2831, 1926, 1710, 1605, 1513, 1484, 1442, 1399, 1335, 1299, 1238, 1108, 829 cm<sup>-1</sup>; HRMS(ESI) Calcd. for C<sub>27</sub>H<sub>22</sub>O<sub>3</sub> ([M+Na]<sup>+</sup>): 461.1359, Found: 461.1361.

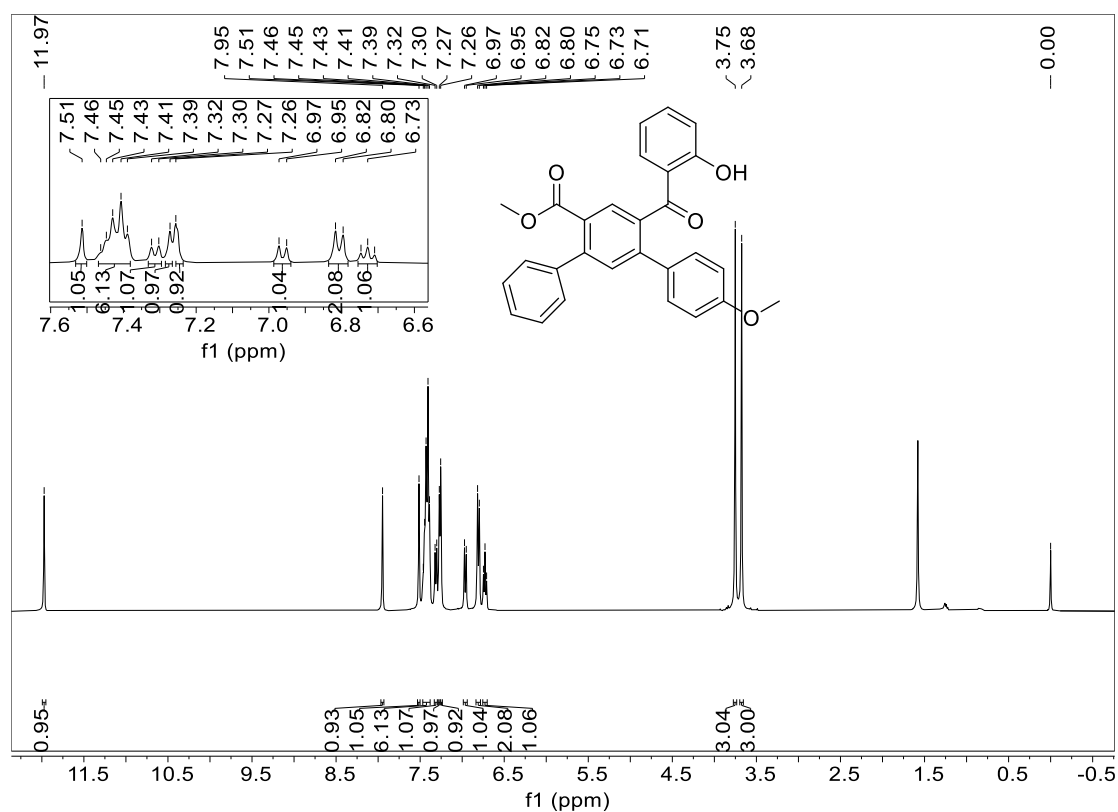

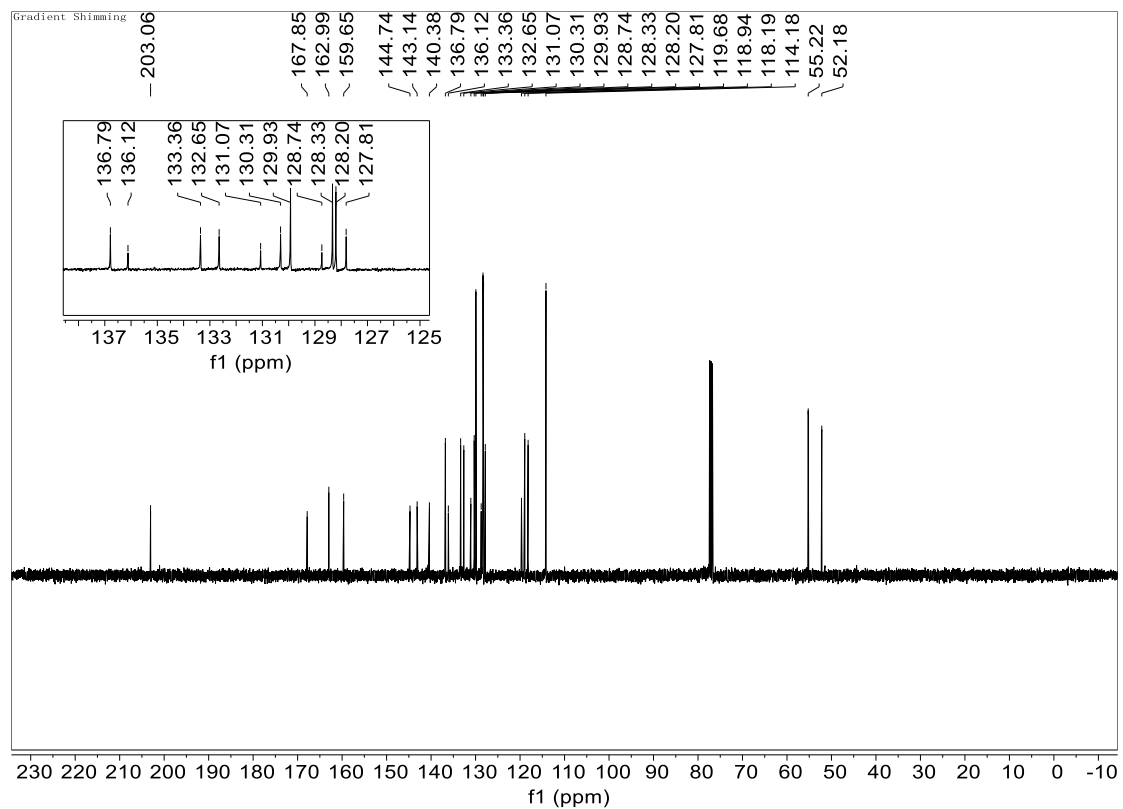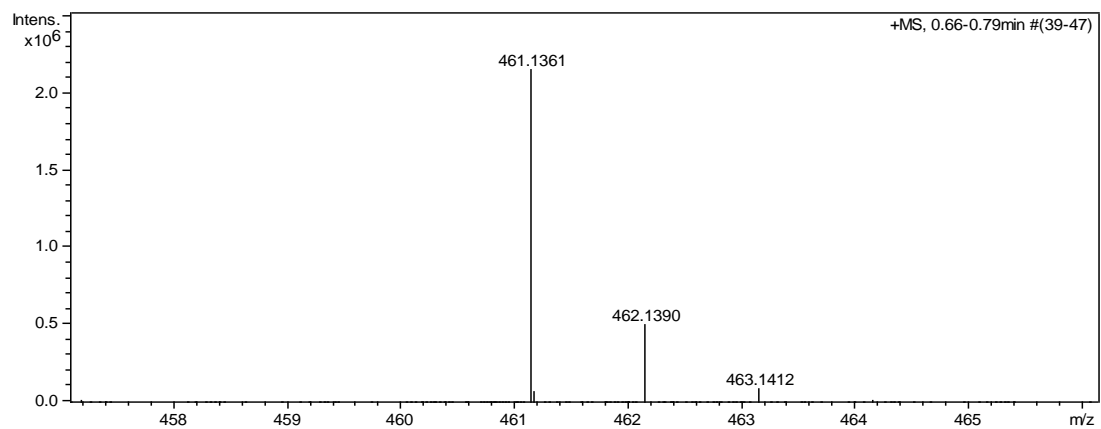

**Methyl 4''-chloro-6'-(2-hydroxybenzoyl)-4-methyl-[1,1':3',1''-terphenyl]-4'-carboxylate (3k):**

White solid, 67%, m.p. 164-167°C; <sup>1</sup>H NMR (400 MHz, CDCl<sub>3</sub>) δ: 11.92 (s, 1H, OH), 7.98 (s, 1H, ArH), 7.48 ~ 7.41 (m, 4H, ArH), 7.32 (d, *J* = 8.0 Hz, 3H, ArH), 7.21 (d, *J* = 7.6 Hz, 2H, ArH), 7.09 (d, *J* = 8.4 Hz, 2H, ArH), 6.96 (d, *J* = 8.4 Hz, 1H, ArH), 6.75 (d, *J* = 7.6 Hz, 1H, ArH), 3.71 (s, 3H, OCH<sub>3</sub>), 2.29 (s, 3H, CH<sub>3</sub>); <sup>13</sup>C NMR (101 MHz, CDCl<sub>3</sub>) δ: 202.6, 167.3, 162.9, 143.7, 143.5, 138.8, 138.3, 136.7, 136.5, 135.5, 133.9, 133.2, 132.7, 130.4, 129.6, 129.4, 128.5, 128.4, 128.3, 119.6, 118.9, 118.2, 52.2, 21.1; IR (KBr) ν: 3717, 3023, 2884, 2780, 1841, 1724, 1626, 1601, 1484, 1400, 1337, 1303, 1237, 1110, 827, 753, 660 cm<sup>-1</sup>; HRMS (ESI) Calcd. for C<sub>28</sub>H<sub>21</sub>ClO<sub>4</sub> ([M+Na]<sup>+</sup>): 479.1021, Found: 479.1012.

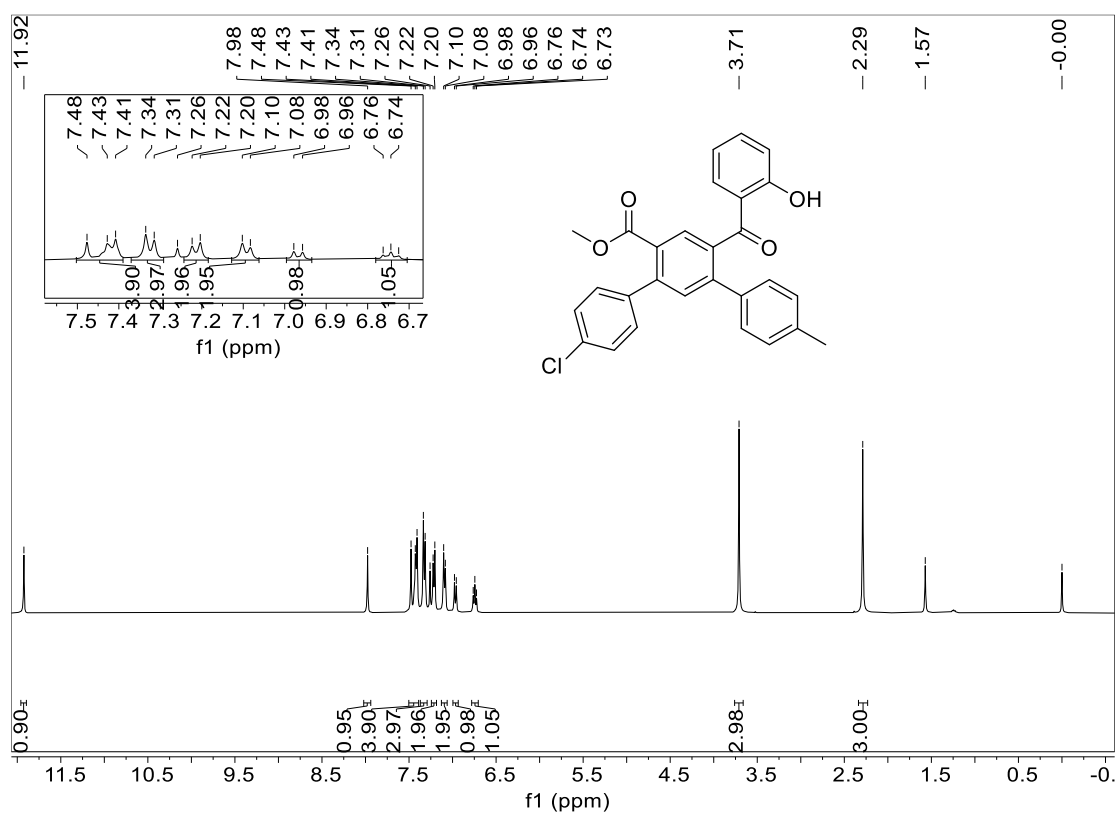

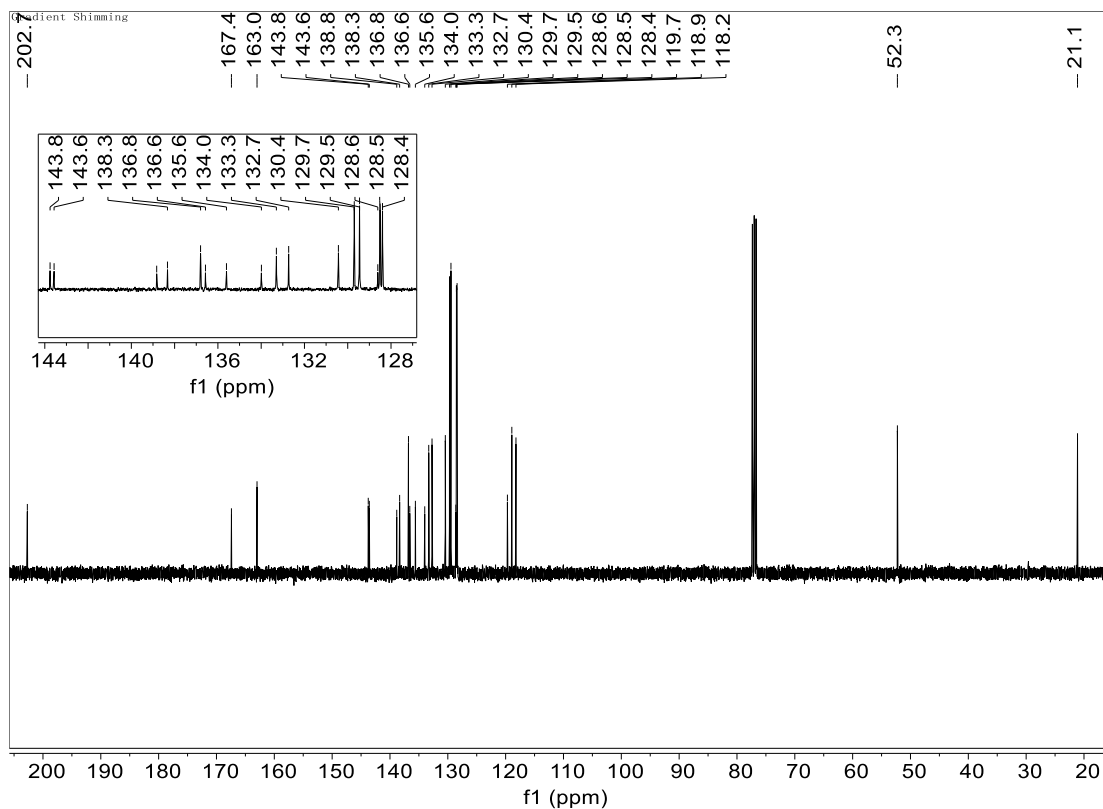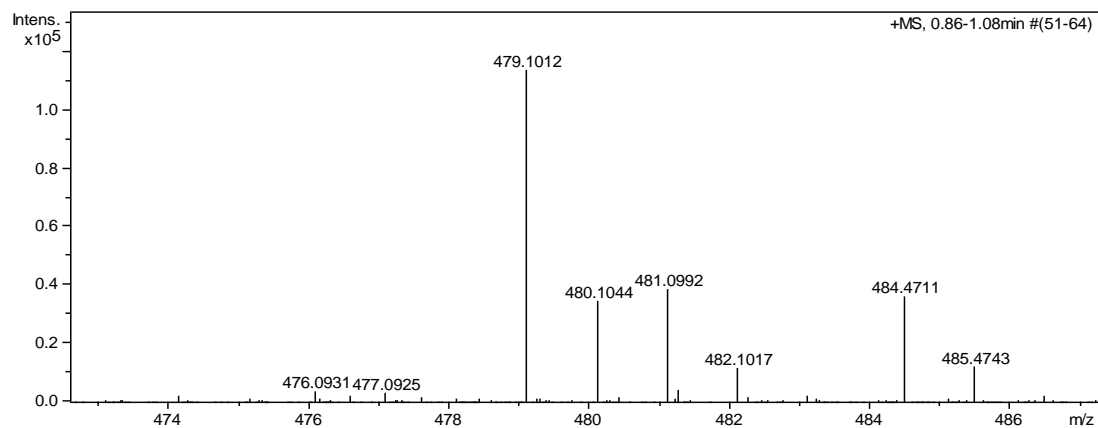



**Methyl 4''-bromo-6'-(2-hydroxybenzoyl)-4-methyl-[1,1':3',1''-terphenyl]-4'-carboxylate (3I):**

White solid, 65%, m.p. 180-181 °C; <sup>1</sup>H NMR (400 MHz, CDCl<sub>3</sub>) δ: 11.91 (s, 1H, OH), 7.97 (s, 1H, ArH), 7.57 (d, *J* = 8.4 Hz, 2H, ArH), 7.47 (s, 1H, ArH), 7.31 (dd, *J*<sub>1</sub> = 8.0 Hz, *J*<sub>2</sub> = 1.6 Hz, 1H, ArH), 7.27 (s, 1H, ArH), 7.25 (s, 1H, ArH), 7.20 (d, *J* = 8.0 Hz, 2H, ArH), 7.09 (d, *J* = 8.0 Hz, 2H, ArH), 6.96 (d, *J* = 8.4 Hz, 1H, ArH), 6.74 (t, *J* = 8.0 Hz, 3H, ArH), 3.71 (s, 3H, OCH<sub>3</sub>), 2.29 (s, 3H, CH<sub>3</sub>); <sup>13</sup>C NMR (101 MHz, CDCl<sub>3</sub>) δ: 202.4, 167.8, 163.0, 144.8, 142.1, 137.8, 137.2, 137.0, 136.9, 135.9, 134.4, 133.1, 132.6, 130.2, 129.9, 129.5, 129.0, 128.8, 128.1, 119.6, 118.9, 118.3, 52.2, 21.2; IR (KBr) ν: 3615, 3330, 3023, 2945, 1724, 1628, 1519, 1435, 1336, 1330, 1068, 992, 870, 788, 695 cm<sup>-1</sup>; HRMS (ESI) Calcd. for C<sub>28</sub>H<sub>21</sub>BrO<sub>4</sub> ([M+Na]<sup>+</sup>): 523.0515, Found: 523.0514.

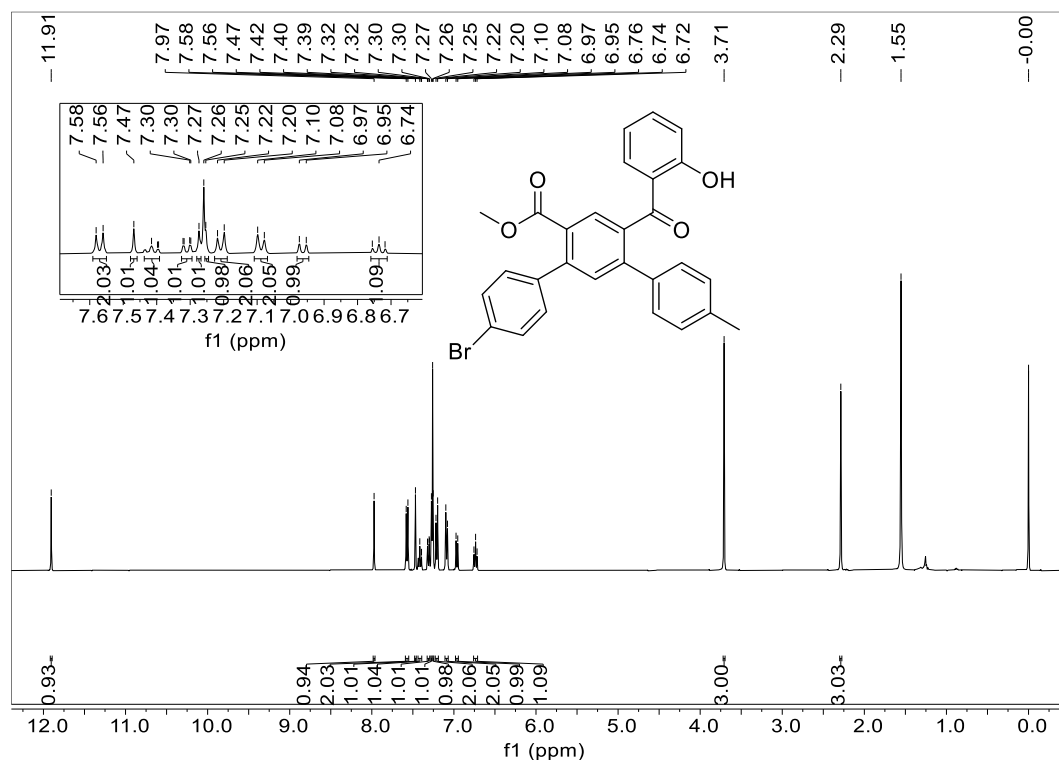

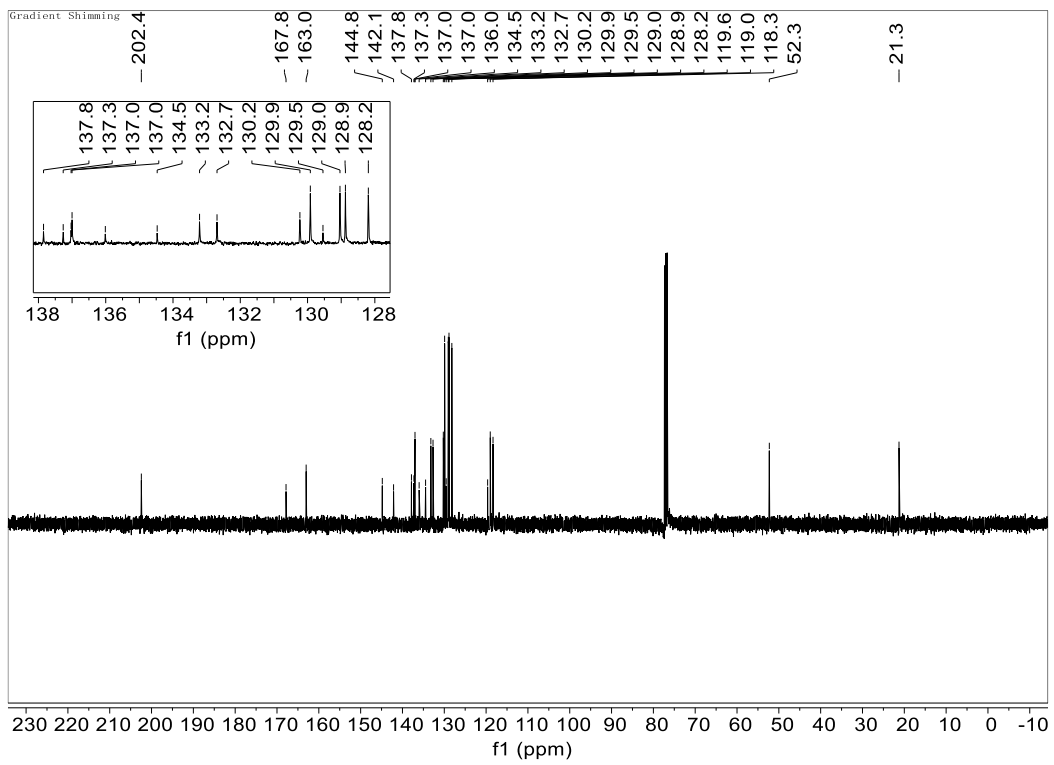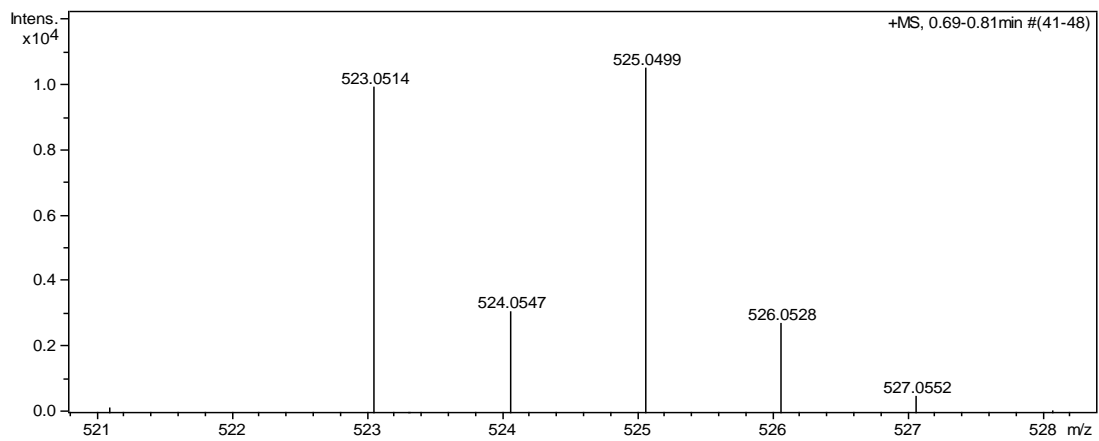

**1. General procedure for preparation of the tetra-substituted benzenes 5a-5g:** To a 50 mL round flask was added 1-phenacyl-4-(N,N-dimethylamino)pyridinium bromide (0.5 mmol), chalcone *o*-enolate (1.0 mmol), DMF (8.0 mL) and TMD (1.0 mmol). The mixture was stirred at 100 °C for twelve hours. After removing the solvent, the residue was subjected to column chromatography (300 ~ 400 mesh) with mixed petroleum ether and ethyl acetate (V/V = 15:1) as eluent to give the pure product for analysis.

**Dimethyl 6'-(2-hydroxybenzoyl)-4,4''-dimethyl-[1,1':3',1''-terphenyl]-4',5'-dicarboxylate (5a):**

White solid, 58%, m.p. 208 – 209 °C; <sup>1</sup>H NMR (400 MHz, CDCl<sub>3</sub>) δ: 11.64 (s, 1H, OH), 7.59 (s, 1H, ArH), 7.37 ~ 7.32 (m, 3H, ArH), 7.24 (d, *J* = 8.4 Hz, 2H, ArH), 7.19 (dd, *J*<sub>1</sub> = 7.6 Hz, *J*<sub>2</sub> = 1.2 Hz, 1H, ArH), 7.12 (d, *J* = 8.4 Hz, 2H, ArH), 7.03 (d, *J* = 8.0 Hz, 2H, ArH), 6.89 (d, *J* = 8.4 Hz, 1H, ArH), 6.69 (t, *J* = 7.2 Hz, 1H, ArH), 3.67 (s, 3H, OCH<sub>3</sub>), 3.60 (s, 3H, OCH<sub>3</sub>), 2.41 (s, 3H, CH<sub>3</sub>), 2.26 (s, 3H, CH<sub>3</sub>); <sup>13</sup>C NMR (101 MHz, CDCl<sub>3</sub>) δ: 202.1, 168.4, 166.3, 161.8, 141.9, 138.2, 138.0, 136.3, 136.0, 135.8, 135.3, 134.6, 132.2, 132.2, 130.2, 129.2, 129.1, 128.6, 128.1, 120.7, 118.9, 117.8, 52.7, 52.5, 21.2, 21.0; IR (KBr) ν: 3672, 2945, 1915, 1729, 1628, 1581, 1515, 1479, 1471, 1431, 1385, 1345, 1303, 1277, 1244, 1063, 964, 944, 912, 873, 833, 75, 762, 698, 672, 653 cm<sup>-1</sup>; HRMS (ESI) Calcd. for C<sub>31</sub>H<sub>26</sub>O<sub>6</sub> ([M+Na]<sup>+</sup>): 517.1622, Found: 517.1622.

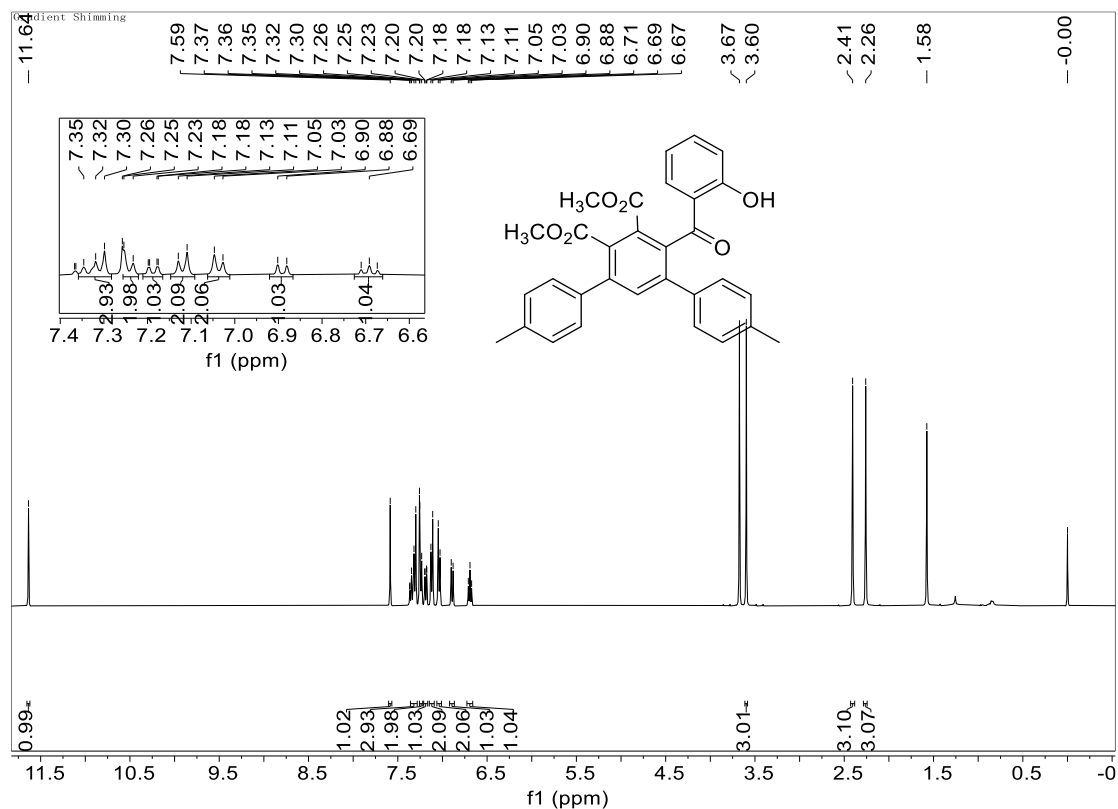

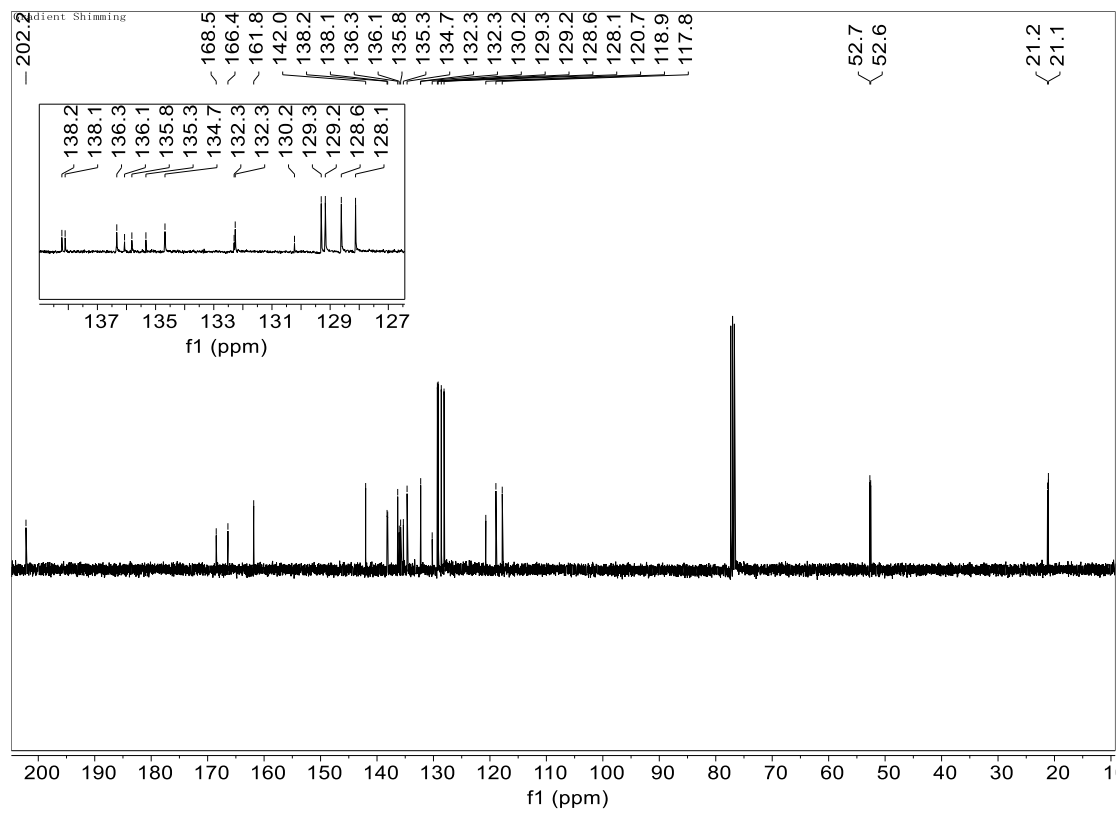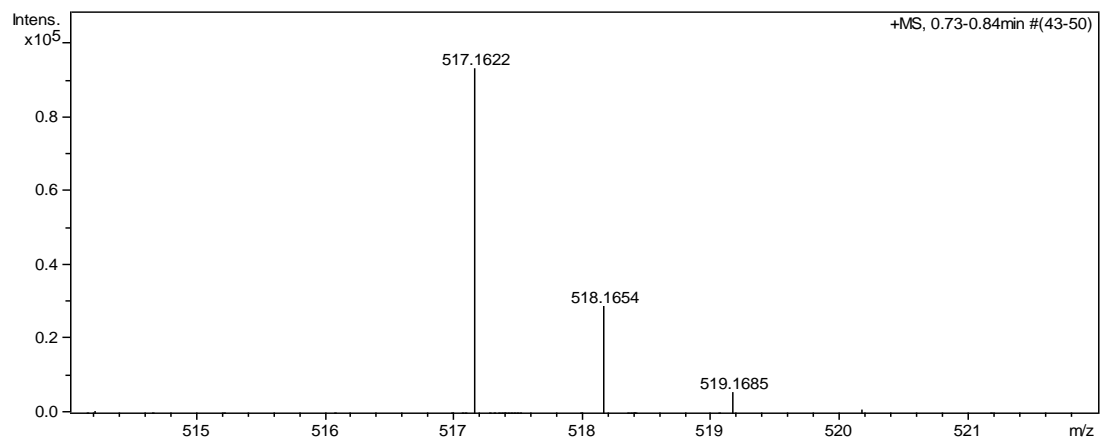

**Dimethyl4''-chloro-6'-(2-hydroxybenzoyl)-4-methyl-[1,1':3',1''-terphenyl]-4',5'-**

**dicarboxylate (5b):** White solid, 65%, m.p. 213 - 215 °C; <sup>1</sup>H NMR (400 MHz, CDCl<sub>3</sub>) δ: 11.60 (s, 1H, OH), 7.55 (s, 1H, ArH), 7.42 (d, *J* = 8.4 Hz, 2H, ArH), 7.36 (s, 2H, ArH), 7.34 (s, 1H, ArH), 7.18 ~ 7.16 (m, 1H, ArH), 7.11 (d, *J* = 8.0 Hz, 2H, ArH), 7.04 (d, *J* = 8.0 Hz, 2H, ArH), 6.89 (d, *J* = 7.6 Hz, 1H, ArH), 6.70 (t, *J* = 7.6 Hz, 1H, ArH), 3.68 (s, 3H, OCH<sub>3</sub>), 3.60 (s, 3H, OCH<sub>3</sub>), 2.26 (s, 3H, CH<sub>3</sub>); <sup>13</sup>C NMR (101 MHz, CDCl<sub>3</sub>) δ: 201.8, 168.1, 166.1, 161.8, 142.2, 140.7, 138.2, 137.1, 136.6, 136.4, 135.0, 134.6, 134.4, 132.3, 132.1, 130.3, 129.6, 129.1, 128.7, 128.5, 120.6, 118.9, 117.8, 109.9, 52.7, 52.6, 21.0; IR (KBr) ν: 3673, 2947, 1914, 1729, 1630, 1514, 1492, 1451, 1432, 1383, 1344, 1303, 1279, 1239, 1218, 1188, 1063, 962, 942, 913, 874, 842, 784, 763, 698, 672, 618 cm<sup>-1</sup>; HRMS (ESI) Calcd. for C<sub>30</sub>H<sub>23</sub>ClO<sub>6</sub> ([M+Na]<sup>+</sup>): 537.1072, Found: 537.1072.

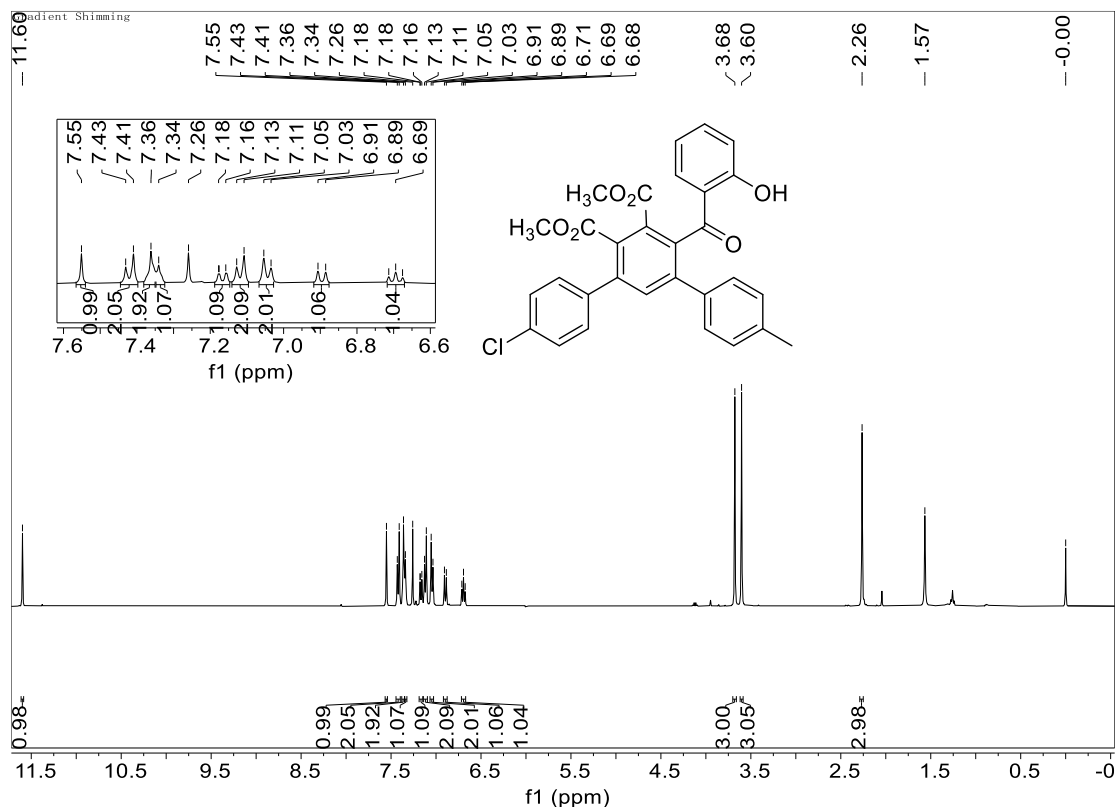

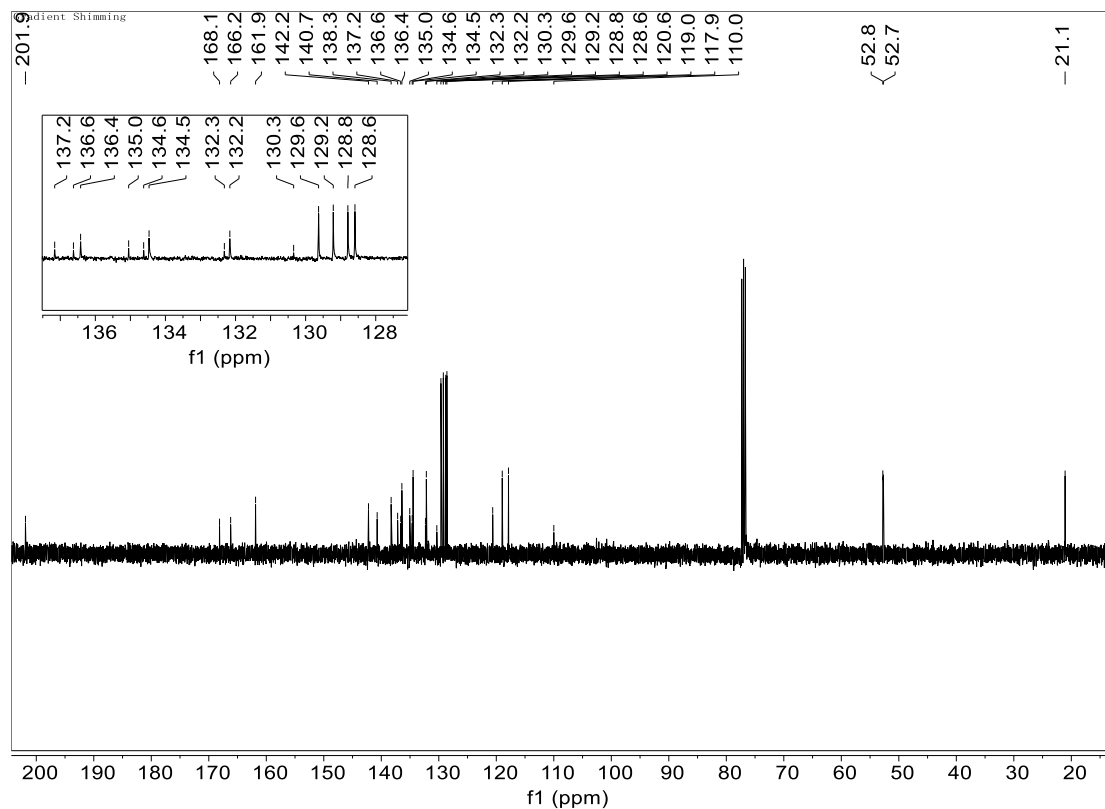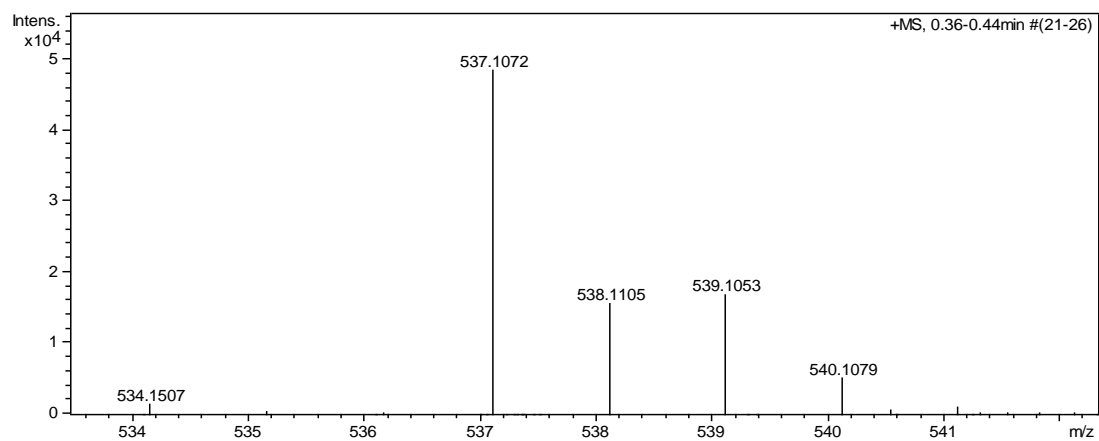

**Dimethyl 6'-(2-hydroxybenzoyl)-4-methyl-[1,1':3,1''-terphenyl]-4',5'-dicarboxylate (5c):**

White solid, 72%, m.p. 179 – 181 °C; <sup>1</sup>H NMR (400 MHz, CDCl<sub>3</sub>) δ: 11.63 (s, 1H, OH), 7.60 (s, 1H, ArH), 7.44 ~ 7.42 (m, 5H, ArH), 7.35 (t, *J*=7.6 Hz, 1H, ArH), 7.18 (d, *J*= 8.0 Hz, 1H, ArH), 7.12 (d, *J* = 7.6 Hz, 2H, ArH), 7.04 (d, *J* = 7.6 Hz, 2H, ArH), 6.89 (d, *J* = 8.4 Hz, 1H, ArH), 6.70 (t, *J*=7.6 Hz, 1H, ArH), 3.65 (s, 3H, OCH<sub>3</sub>), 3.60 (s, 3H, OCH<sub>3</sub>), 2.26 (s, 3H, CH<sub>3</sub>); <sup>13</sup>C NMR (101 MHz, CDCl<sub>3</sub>) δ: 202.0, 168.3, 166.3, 161.8, 142.0, 142.0, 138.7, 138.1, 136.3, 136.2, 135.2, 134.6, 132.4, 132.2, 130.2, 129.1, 128.6, 128.5, 128.3, 128.2, 120.7, 118.9, 117.8, 52.7, 52.5, 21.0; IR (KBr) ν: 3672, 2946, 1729, 1628, 1581, 1479, 1346, 1187, 1003, 963, 939, 909, 870, 840, 822, 763, 740, 665, 619 cm<sup>-1</sup>; HRMS (ESI) Calcd. for C<sub>30</sub>H<sub>24</sub>O<sub>6</sub> ([M+Na]<sup>+</sup>): 503.1465, Found: 503.1466.

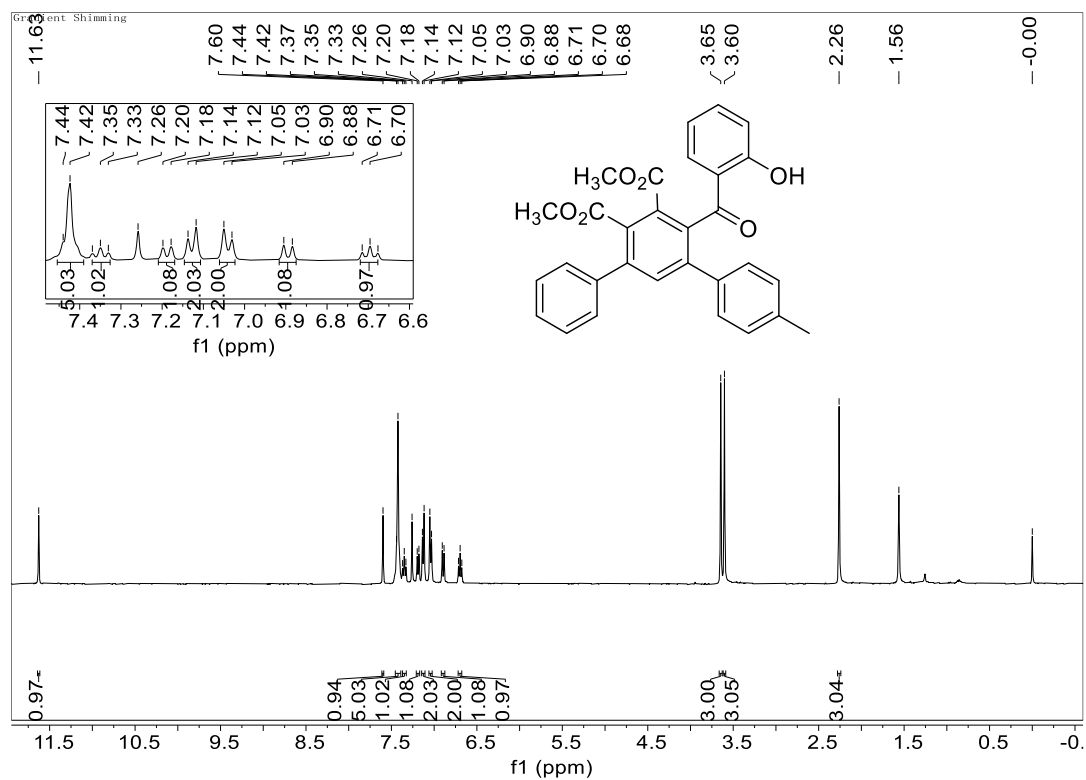

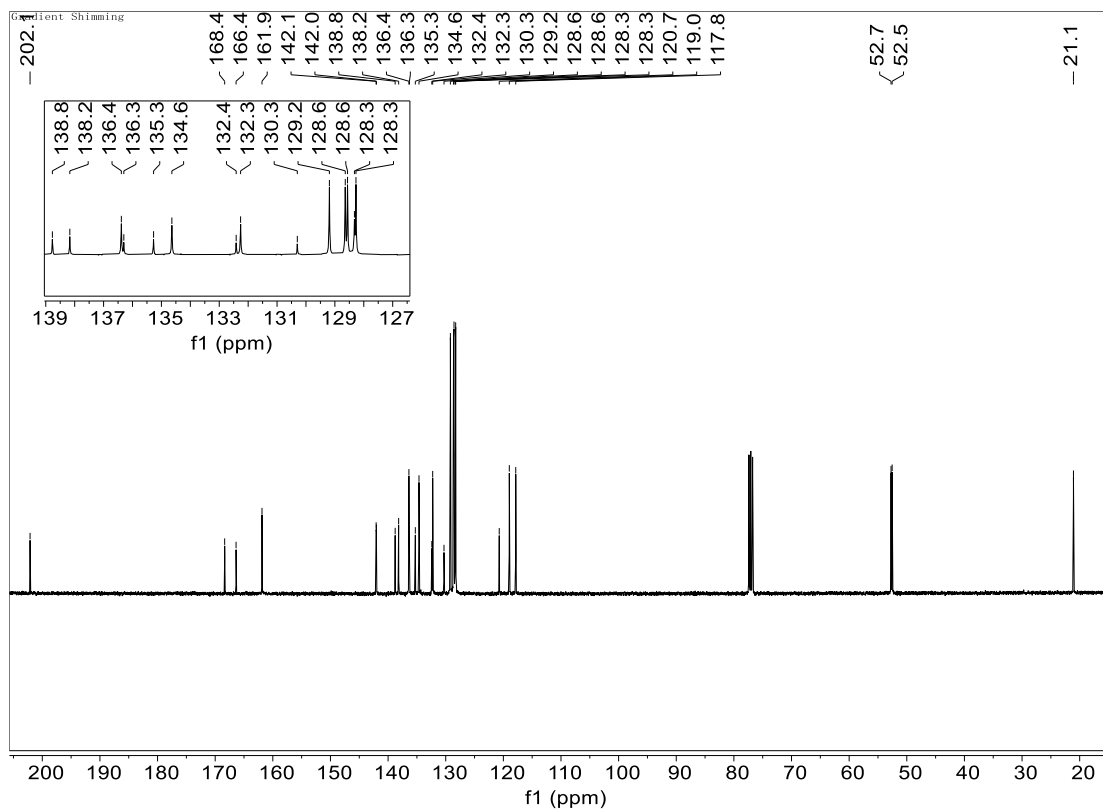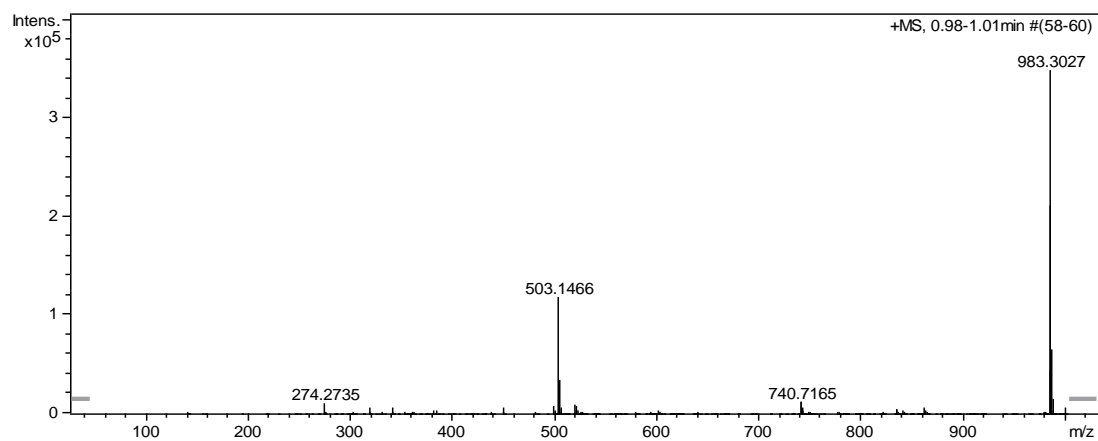



**Dimethyl****4''-bromo-6'-(2-hydroxybenzoyl)-4-methyl-[1,1':3',1''-terphenyl]-4',5'-**

**dicarboxylate (5d):** White solid, 78%, m.p. 207 -208 °C; <sup>1</sup>H NMR (400 MHz, CDCl<sub>3</sub>) δ: 11.60 (s, 1H, OH), 7.57 (d, *J* = 8.4 Hz, 2H, ArH), 7.55 (s, 1H, ArH), 7.38 ~7.34 (m, 1H, ArH), 7.29 (d, *J* = 8.4 Hz, 2H, ArH), 7.17 (dd, *J*<sub>1</sub> = 1.2 Hz, *J*<sub>2</sub> = 8.0 Hz, 2H, ArH), 7.11 (d, *J* = 8.4 Hz, 2H, ArH), 7.04 (d, *J* = 8.0 Hz, 2H, ArH), 6.89 (d, *J* = 8.4 Hz, 1H, ArH), 6.70 (t, *J* = 8.0 Hz, 1H, ArH), 3.68 (s, 3H, OCH<sub>3</sub>), 3.61 (s, 3H, OCH<sub>3</sub>), 2.27 (s, 3H, CH<sub>3</sub>); <sup>13</sup>C NMR (101 MHz, CDCl<sub>3</sub>) δ: 201.8, 168.0, 166.1, 161.8, 142.2, 140.7, 138.2, 137.6, 136.6, 136.4, 135.0, 134.3, 132.2, 132.1, 131.7, 130.3, 129.9, 129.2, 128.5, 122.8, 120.6, 118.9, 117.8, 52.7, 52.7, 21.0; IR (KBr) ν: 3672, 3046, 2950, 1748, 1728, 1628, 1606, 1487, 1382, 1300, 1187, 1280, 1003, 963, 939, 909, 870, 840, 822, 763, 740, 665, 619 cm<sup>-1</sup>; HRMS (ESI) Calcd. for C<sub>30</sub>H<sub>23</sub>BrO<sub>6</sub> ([M+Na]<sup>+</sup>): 581.0570, Found: 581.0572.

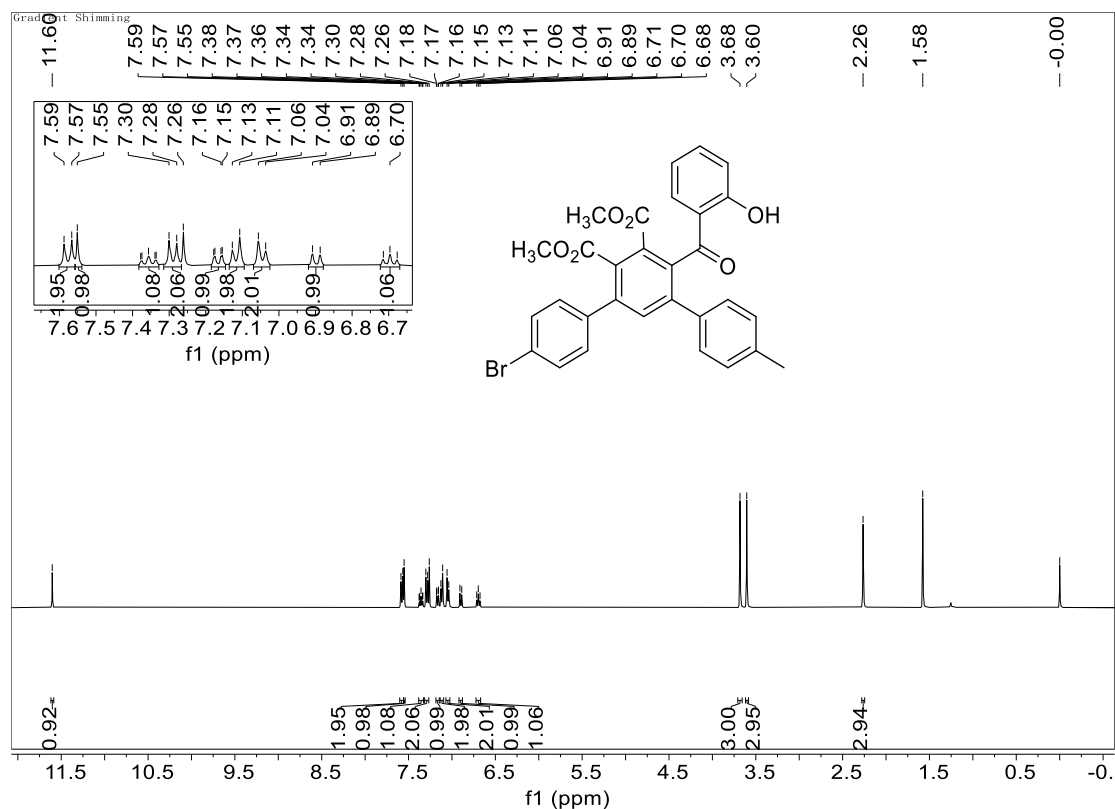

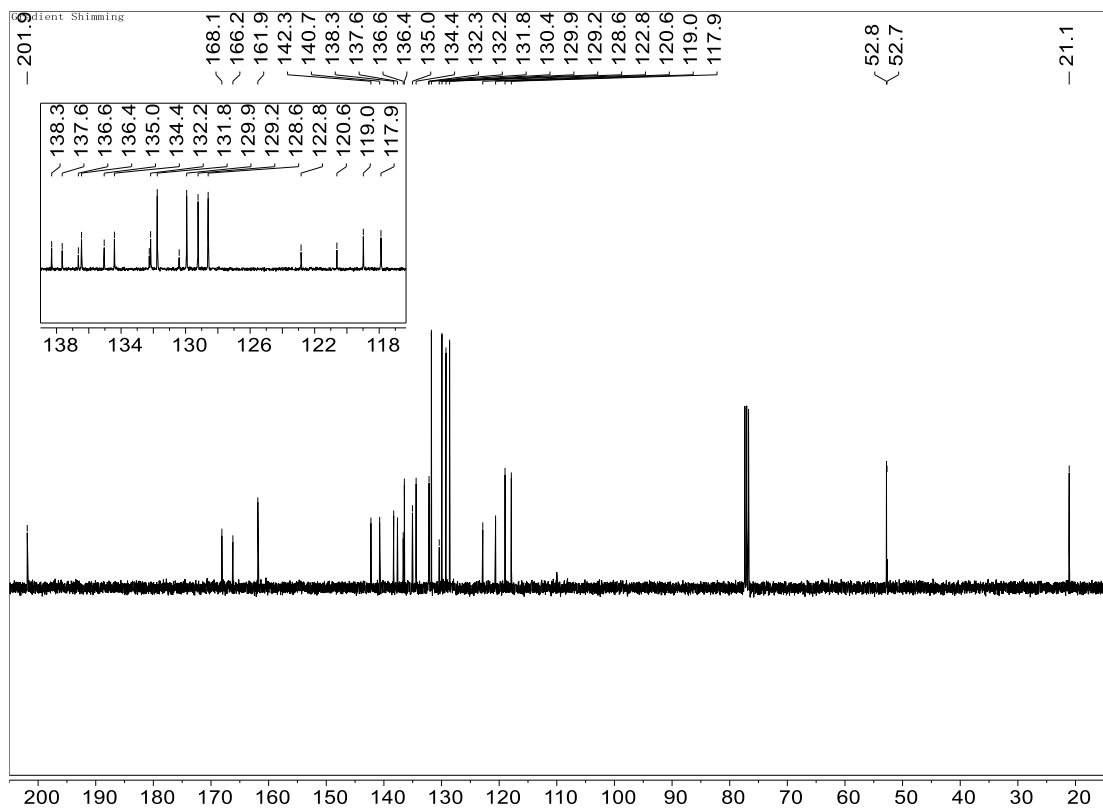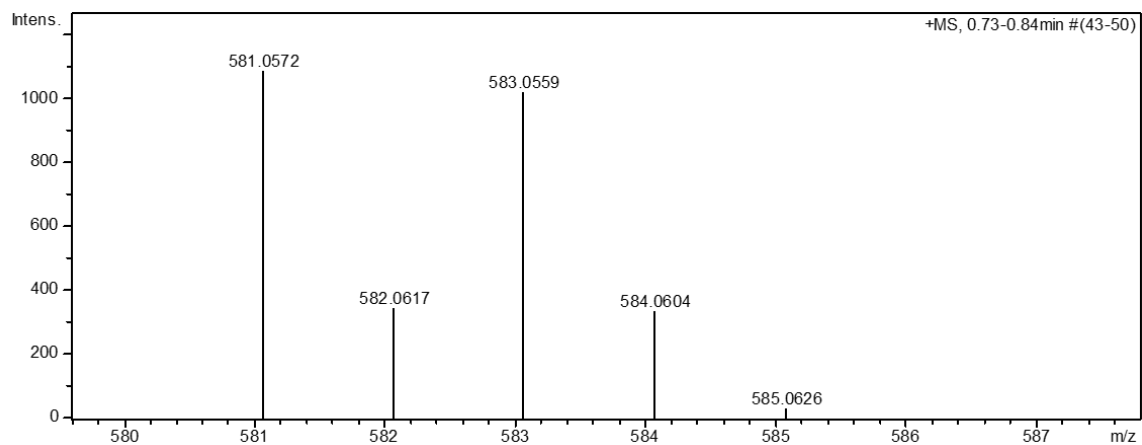

**Dimethyl 4''-bromo-6'-(2-hydroxybenzoyl)-[1,1':3',1''-terphenyl]-4',5'-dicarboxylate (5e):**

White solid, 62%, m.p. 240 – 243 °C; <sup>1</sup>H NMR (400 MHz, CDCl<sub>3</sub>) δ: 11.56 (s, 1H, OH), 7.60 ~ 7.57 (m, 3H, ArH), 7.36 ~ 7.29 (m, 3H, ArH), 7.23 (s, 5H, ArH), 7.16 (d, *J* = 6.8 Hz, 1H, ArH), 6.88 (d, *J* = 8.4 Hz, 1H, ArH), 6.69 (t, *J* = 7.6 Hz, 1H, ArH), 3.69 (s, 3H, OCH<sub>3</sub>), 3.62 (s, 3H, OCH<sub>3</sub>); <sup>13</sup>C NMR (101 MHz, CDCl<sub>3</sub>) δ: 201.7, 168.0, 166.1, 161.8, 142.1, 140.7, 137.9, 137.5, 136.7, 136.4, 134.3, 132.5, 132.1, 131.7, 130.3, 129.9, 128.7, 128.4, 128.3, 122.8, 120.5, 118.9, 117.8, 52.8, 52.7; IR (KBr) ν: 3672, 3059, 2948, 1740, 1632, 1595, 1579, 1488, 1437, 1384, 1345, 1303, 1277, 1244, 1063, 963, 941, 904, 868, 839, 765, 698, 672, 653 cm<sup>-1</sup>; HRMS (ESI) Calcd. for C<sub>29</sub>H<sub>21</sub>BrO<sub>6</sub> ([M+Na]<sup>+</sup>): 567.0414, Found: 567.0424.

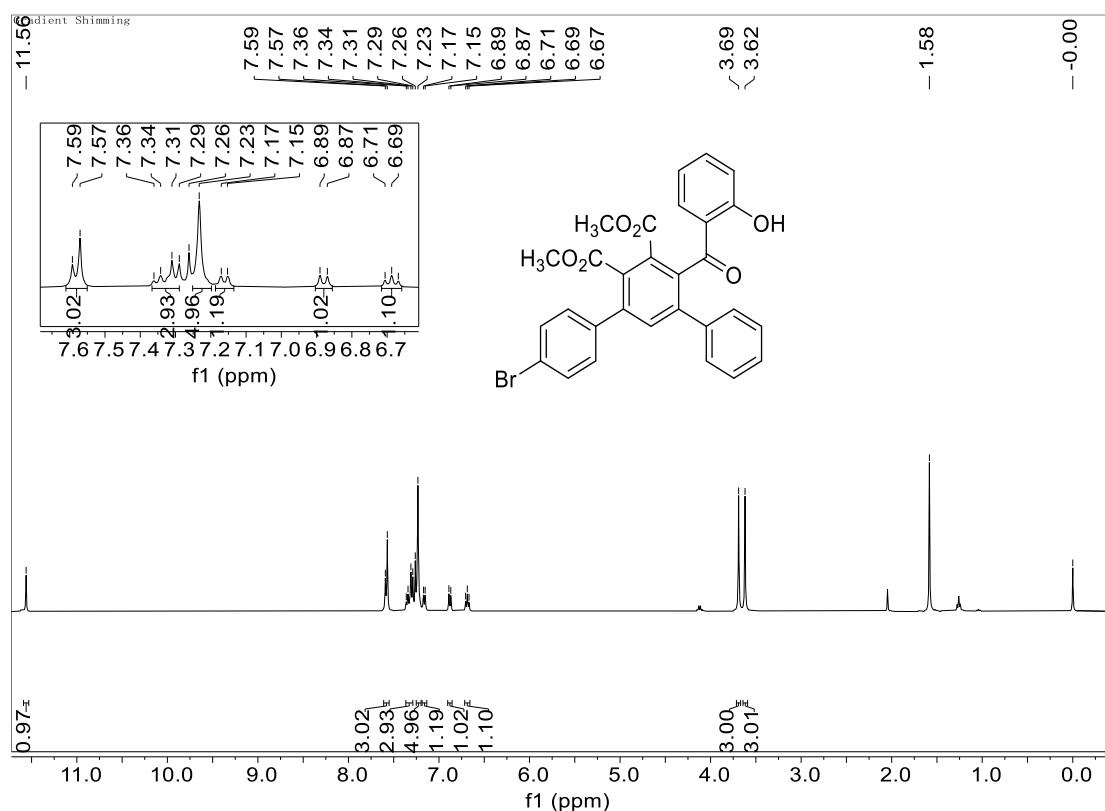

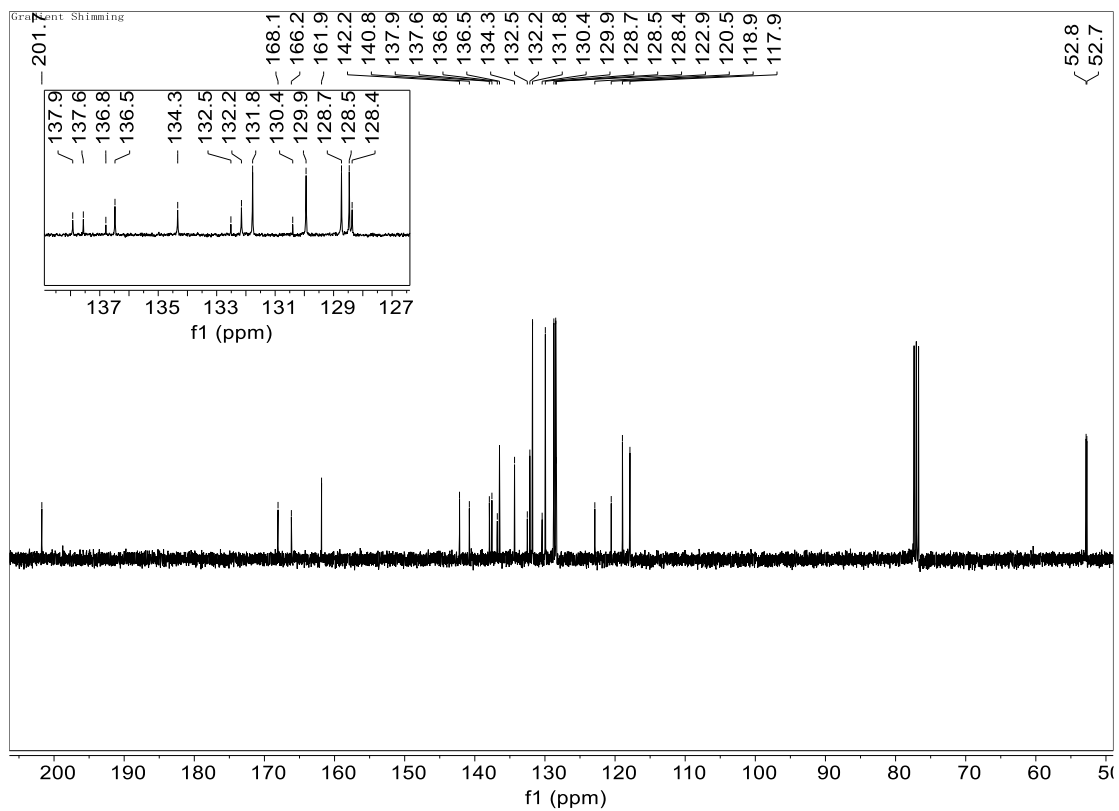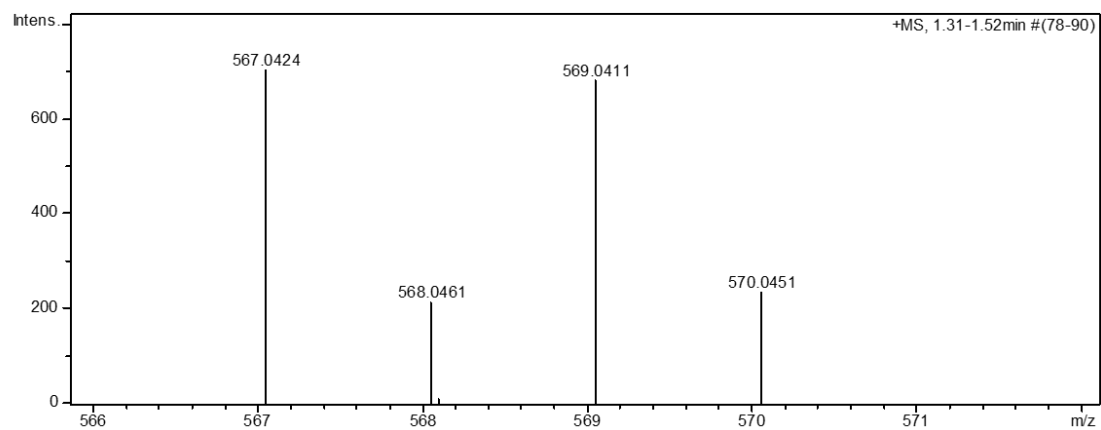

**Dimethyl 4''-bromo-6'-(2-hydroxybenzoyl)-4-methoxy-[1,1':3',1''-terphenyl]-4',5'-dicarboxylate (5f):** White solid, 77%, m.p. 198 – 201 °C; <sup>1</sup>H NMR (400 MHz, CDCl<sub>3</sub>) δ: 11.63 (s, 1H, OH), 7.57 (d, *J* = 8.4 Hz, 1H, ArH), 7.54 (s, 1H, ArH), 7.38 ~ 7.33 (m, 1H, ArH), 7.29 (d, *J* = 8.4 Hz, 2H, ArH), 7.17 ~ 7.14 (m, 3H, ArH), 6.90 (d, *J* = 8.4 Hz, 1H, ArH), 6.76 (d, *J* = 8.8 Hz, 2H, ArH), 6.69 (t, *J* = 7.6 Hz, 1H, ArH), 3.74 (s, 3H, OCH<sub>3</sub>), 3.68 (s, 3H, OCH<sub>3</sub>), 3.62 (s, 3H, CH<sub>3</sub>); <sup>13</sup>C NMR (101 MHz, CDCl<sub>3</sub>) δ: 202.0, 168.0, 166.2, 161.9, 159.6, 141.8, 140.7, 137.6, 136.5, 136.4, 134.3, 132.1, 132.0, 131.7, 130.4, 130.2, 129.9, 129.9, 122.8, 120.5, 118.9, 117.9, 113.9, 55.1, 52.8, 52.6; IR (KBr) ν: 3675, 3058, 2945, 1742, 1632, 1595, 1579, 1488, 1435, 1382, 1346, 1305, 1277, 1244, 1063, 963, 940, 903, 868, 839, 765, 697, 672, 653 cm<sup>-1</sup>; HRMS (ESI) Calcd. for C<sub>30</sub>H<sub>23</sub>BrO<sub>7</sub> ([M+Na]<sup>+</sup>): 597.0519, Found: 597.0536.

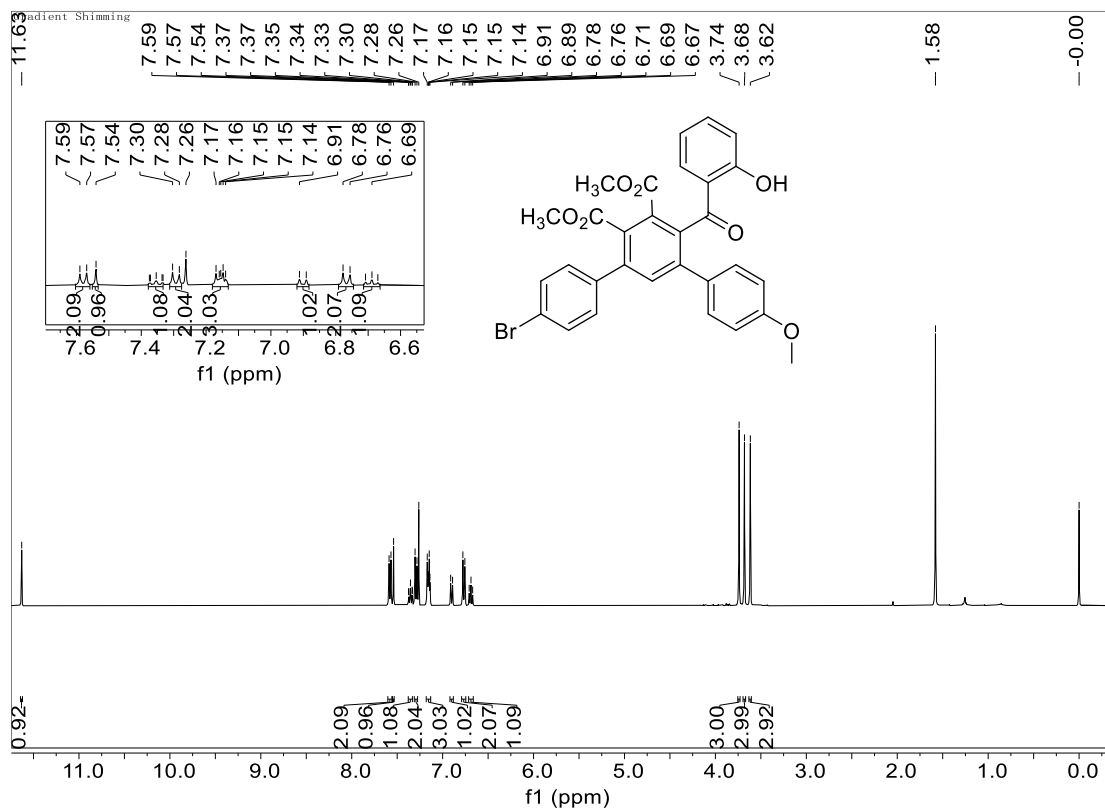

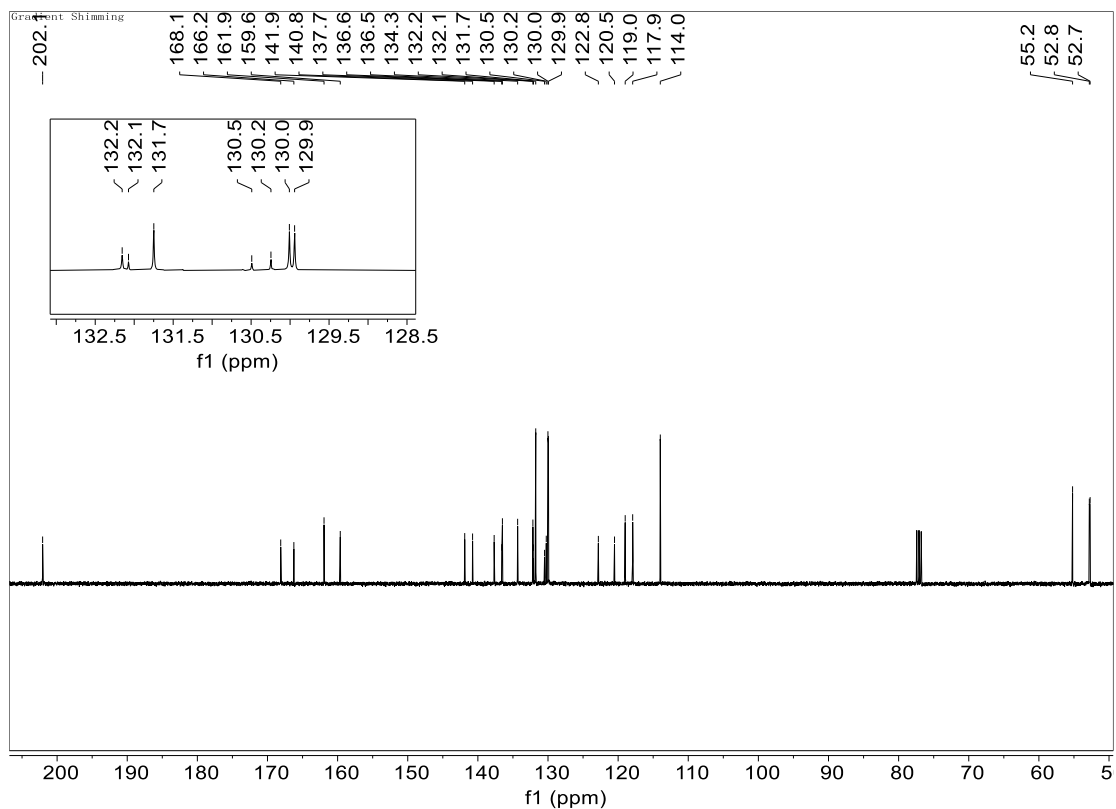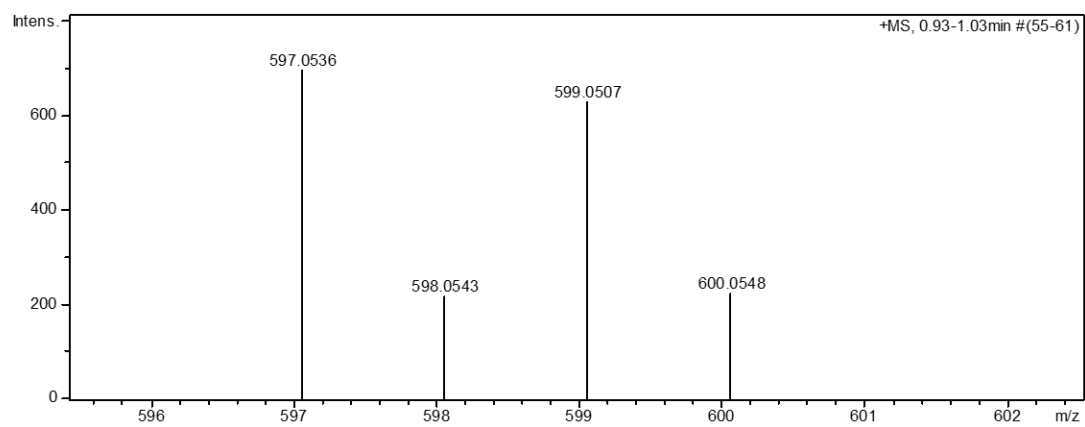

**Dimethyl 4''-bromo-4-chloro-6'-(2-hydroxybenzoyl)-[1,1':3',1''-terphenyl]-4',5'-dicarboxylate (5g):** White solid, 75%, m.p. 172 -173 °C; <sup>1</sup>H NMR (400 MHz, CDCl<sub>3</sub>) δ: 11.54 (s, 1H, OH), 7.58 (d, *J* = 8.4 Hz, 2H, ArH), 7.53 (s, 1H, ArH), 7.38 (t, *J* = 7.6 Hz, 1H, ArH), 7.29 (d, *J* = 8.4 Hz, 2H, ArH), 7.22 (d, *J* = 8.4 Hz, 2H, ArH), 7.17 ~ 7.12 (m, 3H, ArH), 6.91 (d, *J* = 8.4 Hz, 1H, ArH), 6.71 (t, *J* = 8.0 Hz, 1H, ArH), 3.69 (s, 3H, OCH<sub>3</sub>), 3.62 (s, 3H, OCH<sub>3</sub>); <sup>13</sup>C NMR (101 MHz, CDCl<sub>3</sub>) δ: 201.4, 167.8, 165.9, 161.9, 140.8, 140.8, 137.3, 136.7, 136.3, 134.6, 134.2, 132.8, 131.9, 131.7, 130.3, 130.0, 129.9, 128.7, 122.9, 120.4, 119.0, 118.0, 52.8, 52.7; IR (KBr) ν: 3675, 3057, 2946, 1742, 1629, 1594, 1578, 1487, 1437, 1384, 1345, 1303, 1276, 1245, 1063, 963, 941, 902, 868, 839, 765, 696, 672, 653 cm<sup>-1</sup>; HRMS (ESI) Calcd. for C<sub>29</sub>H<sub>20</sub>BrClO<sub>6</sub> ([M+Na]<sup>+</sup>): 601.0024, Found: 601.0030.

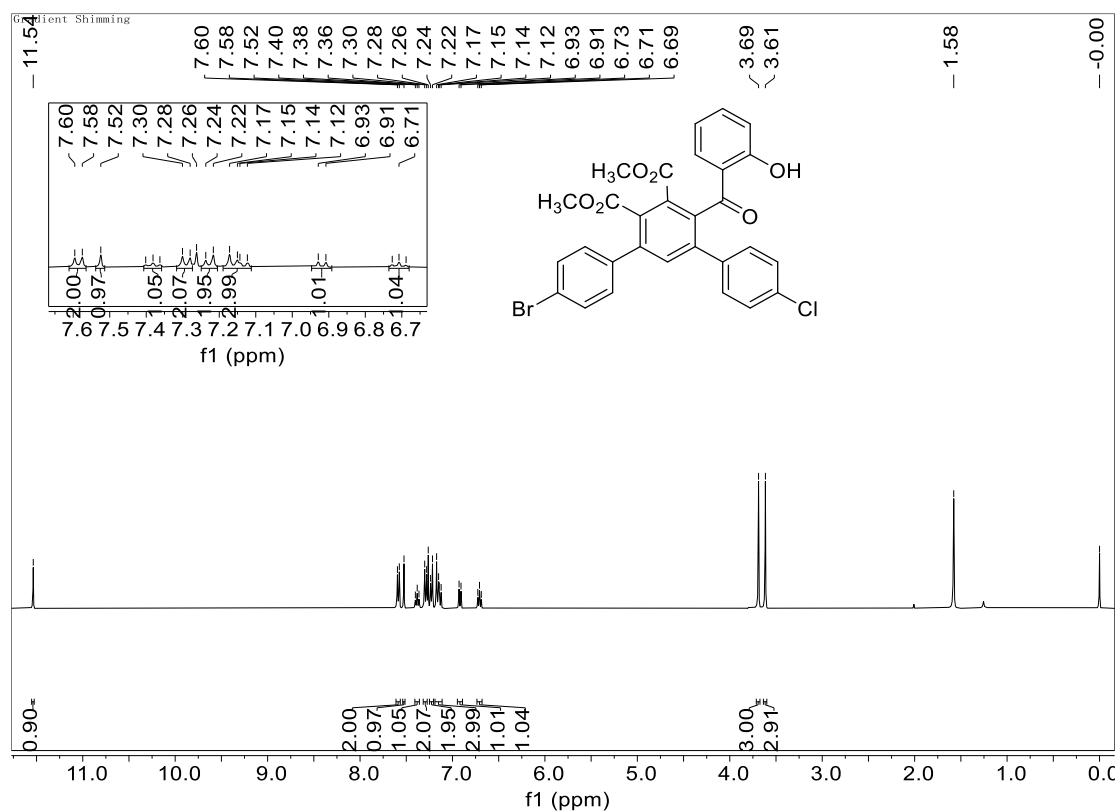

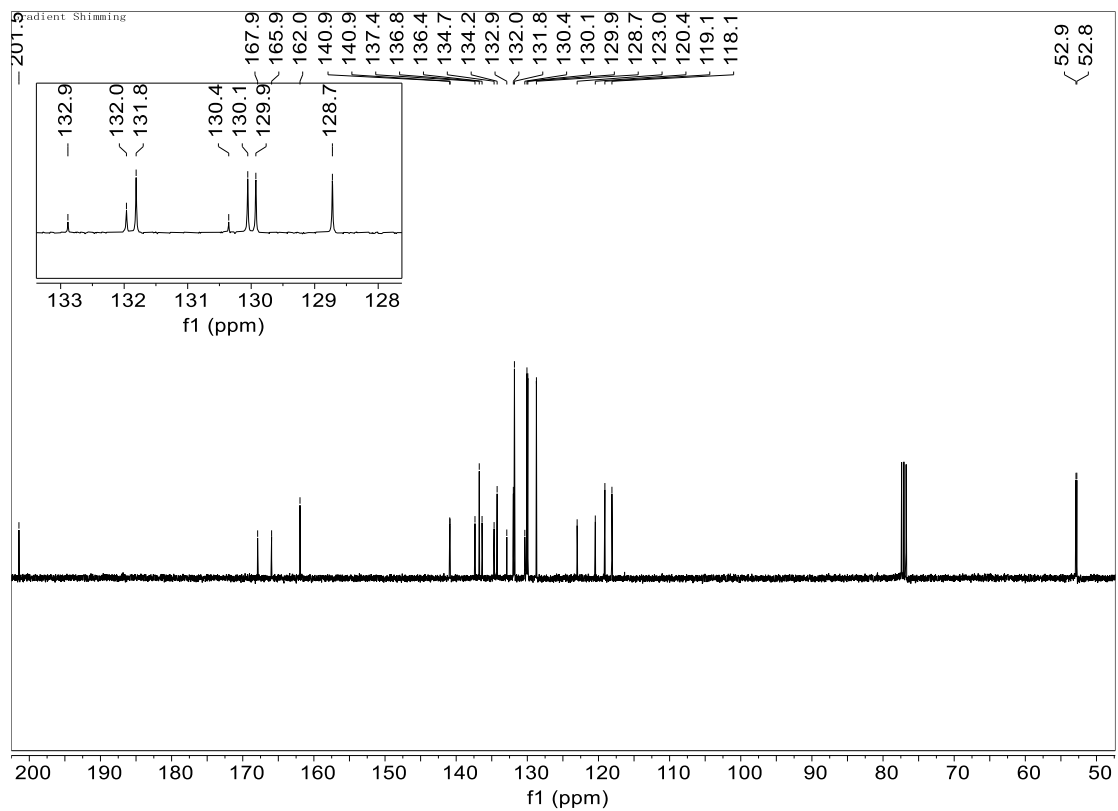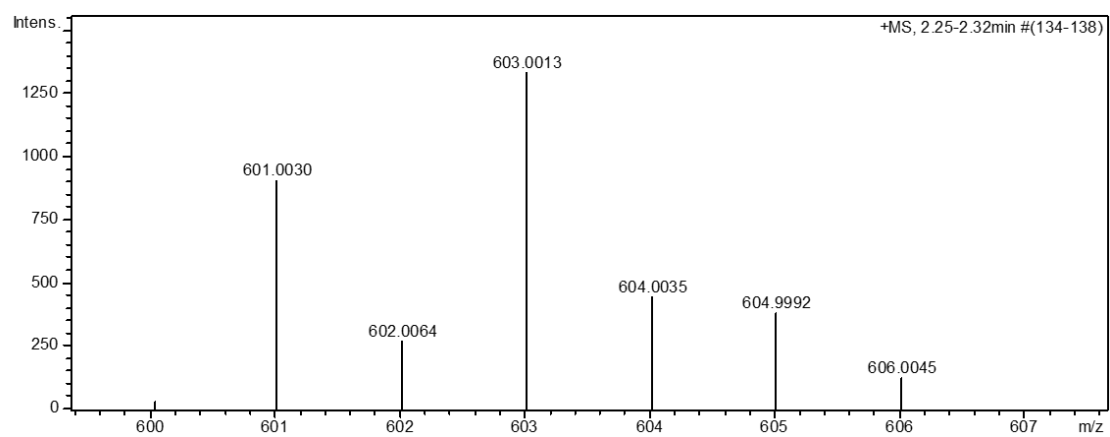



### 3. Practical procedure for the synthesis of the compound 6a:

To a 50 mL round flask was added quinolinium bromide (0.5 mmol), chalcone *o*-enolate (0.5 mmol), acetonitrile (4.0 mL) and TMD (0.5 mmol). The mixture was stirred at room temperature for three hours. Then, DDQ (0.6 mmol) was added. The mixture was stirred at room temperature for 6 hours. After removing the solvent, the residue was subjected to column chromatography (300 ~ 400 mesh) with mixed petroleum ether and ethyl acetate (V/V = 10:1) as eluent to give the pure product for analysis.

**Methyl 3-(2-(1-(4-methoxybenzoyl)-2-(*p*-tolyl)pyrrolo[1,2-*a*]quinoline-3-carbonyl)phenoxy)acrylate (6a):** Yellow solid, 62%, m.p. 154-156 °C; <sup>1</sup>H NMR (400 MHz, CDCl<sub>3</sub>) δ: major 8.35 (d, *J* = 8.0 Hz, 1H, ArH), 7.82 ~ 7.77 (m, 2H, ArH), 7.62 ~ 7.58 (m, 2H, ArH), 7.52 ~ 7.50 (m, 1H, ArH), 7.47 ~ 7.44 (m, 1H, ArH), 7.39 ~ 7.36 (m, 1H, ArH), 7.25 (d, *J* = 2.0 Hz, 1H, ArH), 7.16 ~ 7.11 (m, 1H, ArH), 7.66 ~ 7.03 (m, *J* = 7.6 Hz, 1H, ArH), 6.94 ~ 6.90 (m, 1H, ArH), 6.86 (d, *J* = 8.0 Hz, 2H, ArH), 6.70 ~ 6.63 (m, 2H, ArH), 6.70 ~ 6.63 (m, 5H, ArH), 5.42 (d, *J* = 12.0 Hz, 1H, ArH), 3.75 (s, 3H, OCH<sub>3</sub>), 3.66 (s, 3H, OCH<sub>3</sub>), 2.07 (s, 3H, CH<sub>3</sub>); δ: minor 8.13 (d, *J* = 8.4 Hz, 1H, ArH), 7.69 (s, 1H, ArH), 7.66 (d, *J* = 2.0 Hz, 2H, ArH), 7.58 (s, 1H, ArH), 7.53 (s, 1H, ArH), 7.35 (d, *J* = 2.0 Hz, 1H, ArH), 7.27 (d, *J* = 2.0 Hz, 1H, ArH), 6.96 (d, *J* = 8.0 Hz, 1H, ArH), 5.02 (d, *J* = 12 Hz, 1H, ArH), 3.70 (s, 3H, OCH<sub>3</sub>), 3.60 (s, 3H, OCH<sub>3</sub>), 2.30 (s, 3H, CH<sub>3</sub>); <sup>13</sup>C NMR (101 MHz, CDCl<sub>3</sub>) δ: 190.0, 189.4, 167.4, 163.8, 158.9, 152.5, 136.4, 132.8, 132.7, 132.4, 132.0, 131.1, 130.7, 130.6, 130.2, 128.9, 128.9, 128.8, 128.8, 127.7, 127.6, 127.2, 125.4, 124.9, 124.3, 118.3, 118.3, 117.2, 115.6, 113.8, 101.9, 55.3, 51.1, 20.9; IR (KBr) ν: 3321, 3022, 2949, 1716, 1677, 1646, 1599, 1382, 1169, 1028, 947, 840 cm<sup>-1</sup>; HRMS (ESI) Calcd. for C<sub>38</sub>H<sub>29</sub>NO<sub>6</sub> ([M+Na]<sup>+</sup>): 618.1887, Found: 618.1896.

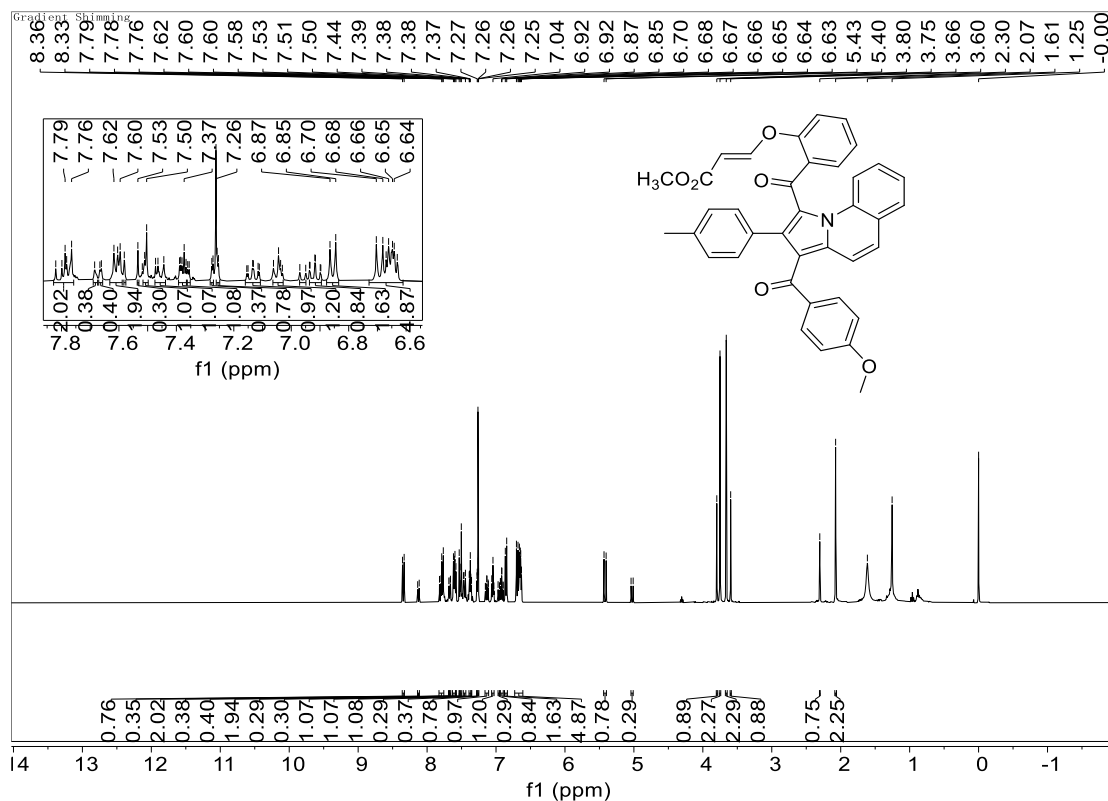

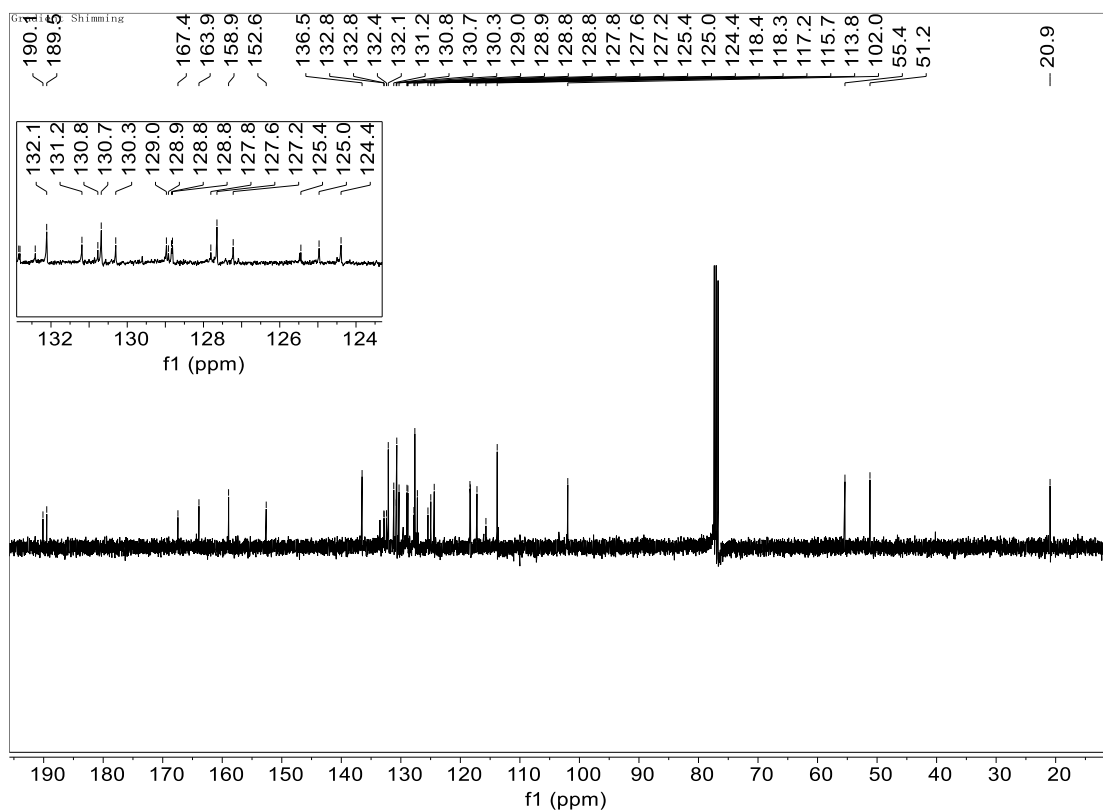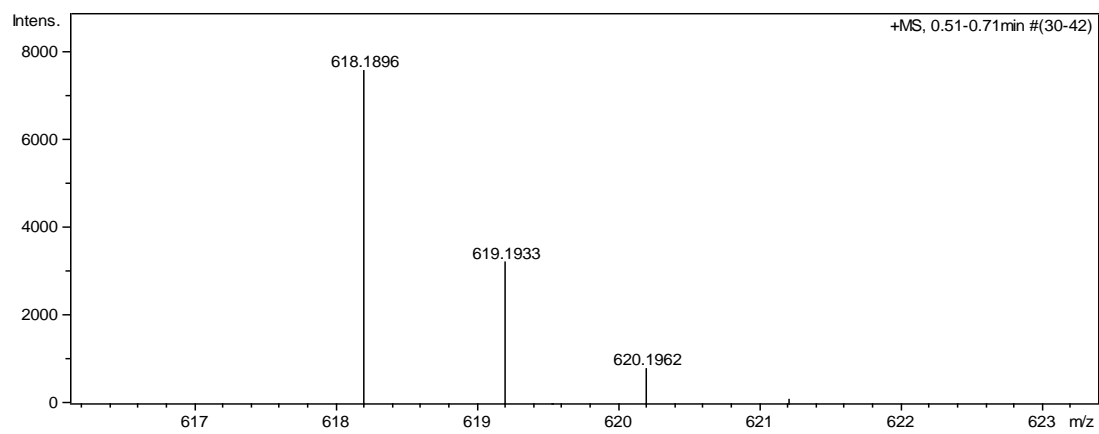

#### 4. Practical procedure for the synthesis of the compound 6b:

To a 50 mL round flask was added isoquinolinium bromide (0.5 mmol), chalcone *o*-enolate (0.5 mmol), acetonitrile (4.0 mL) and TMD (0.5 mmol). The mixture was stirred at room temperature for three hours. Then, DDQ (0.6 mmol) was added. The mixture was stirred at room temperature for 6 hours. After removing the solvent, the residue was subjected to column chromatography (300 ~ 400 mesh) with mixed petroleum ether and ethyl acetate (V/V = 10:1) as eluent to give the pure product for analysis.

**Methyl-3-(2-(3-(4-methoxybenzoyl)-2-(*p*-tolyl)pyrrolo[2,1-*a*]isoquinoline-1-carbonyl)phenoxy)acrylate (6b):** Yellow solid, 64%, m.p. 157- 159 °C; <sup>1</sup>H NMR (400 MHz, CDCl<sub>3</sub>) δ: 8.97 (d, *J* = 6.4 Hz, 1H, ArH), 8.45 (d, *J* = 7.6 Hz, 1H, ArH), 7.71 (d, *J* = 7.2 Hz, 1H, ArH), 7.55 ~ 7.52 (m, 1H, ArH), 7.45 (d, *J* = 8.0 Hz, 4H, ArH), 7.31 (d, *J* = 12.4 Hz, 1H, ArH), 7.23 ~ 7.21 (m, 1H, ArH), 7.13 (d, *J* = 7.2 Hz, 1H, ArH), 6.96 ~ 6.92 (m, 1H, ArH), 6.79 (d, *J* = 6.4 Hz, 2H, ArH), 6.75 ~ 6.73 (m, 1H, ArH), 6.62 (d, *J* = 6.8 Hz, 2H, ArH), 6.51 (d, *J* = 7.6 Hz, 2H, ArH), 5.15 (d, *J* = 12 Hz, 1H, CH), 3.69 (s, 3H, OCH<sub>3</sub>), 3.66 (s, 3H, OCH<sub>3</sub>), 2.06 (s, 3H, CH<sub>3</sub>); <sup>13</sup>C NMR (101 MHz, CDCl<sub>3</sub>) δ: 234.3, 193.8, 186.8, 167.1, 162.5, 159.2, 153.9, 136.4, 135.3, 133.3, 131.9, 131.7, 131.3, 130.7, 130.1, 129.6, 128.3, 127.9, 127.7, 127.0, 124.8, 124.6, 124.3, 124.2, 122.3, 118.9, 118.9, 114.1, 112.8, 101.5, 55.2, 51.2, 20.8; IR (KBr) ν: 3024, 2919, 1734, 1616, 1596, 1480, 1452, 1373, 1208, 1108, 970, 896, 789, 662 cm<sup>-1</sup>; HRMS (ESI) Calcd. for C<sub>38</sub>H<sub>29</sub>NO<sub>6</sub> ([M+Na]<sup>+</sup>): 618.1887, Found: 618.1896.

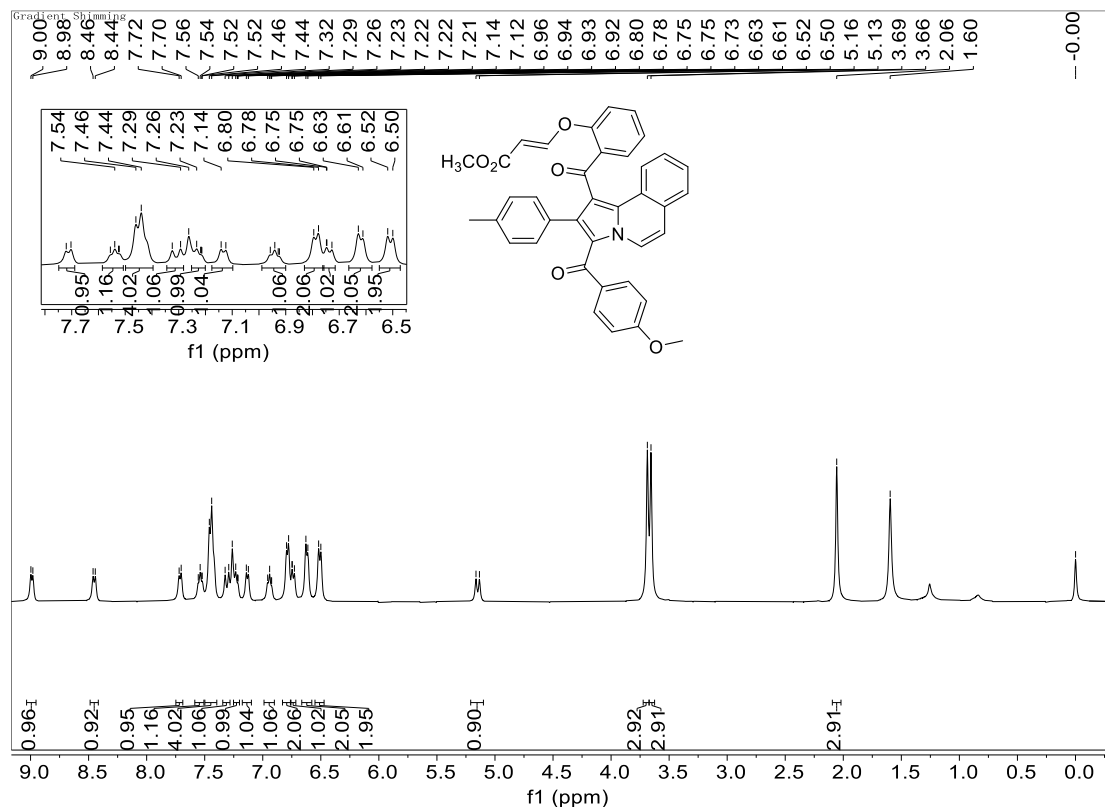

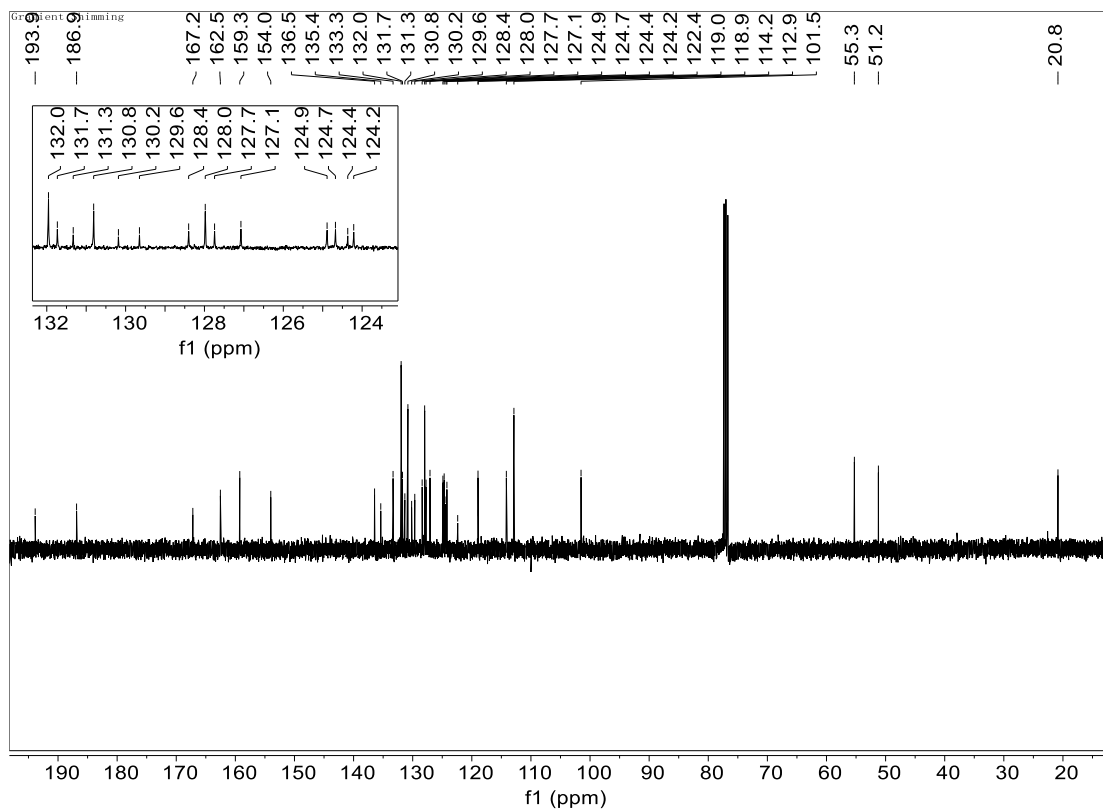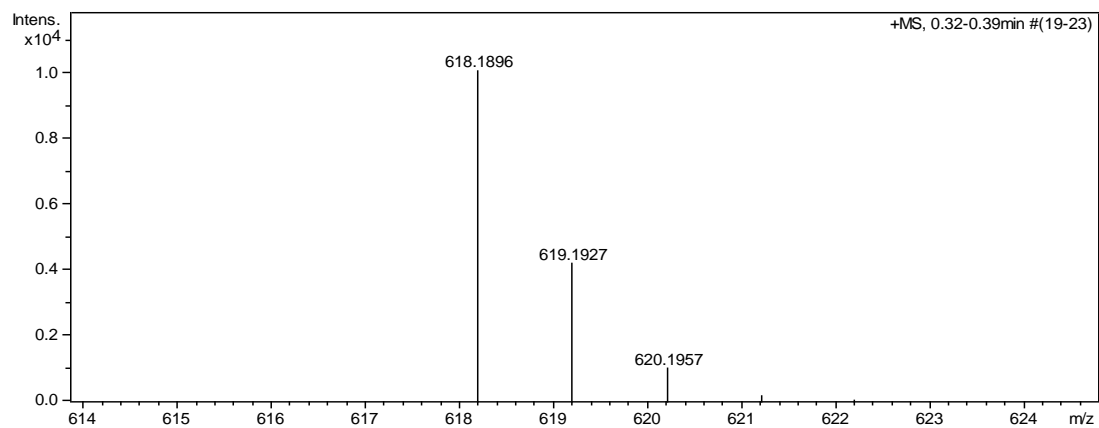

### 3. Practical procedure for the synthesis of the compound 6c:

To a 50 mL round flask was added isoquinolinium bromide (0.5 mmol), chalcone o-enolate (0.5 mmol), acetonitrile (8.0 mL) and TMD (0.5 mmol). The mixture was stirred at 85 °C for twelve hours. After removing the solvent, the residue was subjected to column chromatography (300 ~ 400 mesh) with mixed petroleum ether and ethyl acetate (V/V = 10:1) as eluent to give the pure product for analysis.

**(1-(2-hydroxybenzoyl)-2-(p-tolyl)pyrrolo[2,1-a]isoquinolin-3-yl)(p-tolyl)methanone (6c):** Yellow solid, 56%, m.p. 184-186 °C;  $^1\text{H NMR}$  (400 MHz,  $\text{CDCl}_3$ )  $\delta$ : 12.31 (s, 1H, OH), 9.12 (d,  $J = 7.6$  Hz, 1H, ArH), 7.89 (d,  $J = 8.0$  Hz, 1H, ArH), 7.70 (d,  $J = 8.0$  Hz, 1H, ArH), 7.50 (t,  $J = 7.6$  Hz, 1H, ArH), 7.52 ~ 7.42 (m, 3H, ArH), 7.31 (t,  $J = 7.6$  Hz, 1H, ArH), 7.23 (d,  $J = 8.4$  Hz, 1H, ArH), 7.13 (d,  $J = 7.6$  Hz, 1H, ArH), 7.93 (d,  $J = 8.4$  Hz, 1H, ArH), 6.88 ~ 6.83 (m, 4H, ArH), 6.68 (d,  $J = 7.6$  Hz, 2H, ArH), 6.53 (t,  $J = 7.6$  Hz, 1H, ArH), 2.21 (s, 3H,  $\text{CH}_3$ ), 2.08 (s, 3H,  $\text{CH}_3$ );  $^{13}\text{C NMR}$  (101 MHz,  $\text{CDCl}_3$ )  $\delta$ : 201.9, 187.9, 162.7, 142.3, 136.8, 136.7, 136.0, 135.3, 133.5, 130.4, 130.0, 129.8, 129.5, 128.2, 128.1, 128.1, 127.9, 127.1, 124.5, 124.4, 123.8, 122.4, 121.1, 118.9, 117.7, 115.6, 113.9, 21.3, 20.8. IR (KBr)  $\nu$ : 3652, 2946, 1710, 1667, 1646, 1574, 1513, 1485, 1360, 1308, 1020, 908, 834, 771, 656  $\text{cm}^{-1}$ ; HRMS (ESI) Calcd. for  $\text{C}_{34}\text{H}_{28}\text{NO}_3$  ( $[\text{M}+\text{Na}]^+$ ): 518.1727, Found: 518.1751.

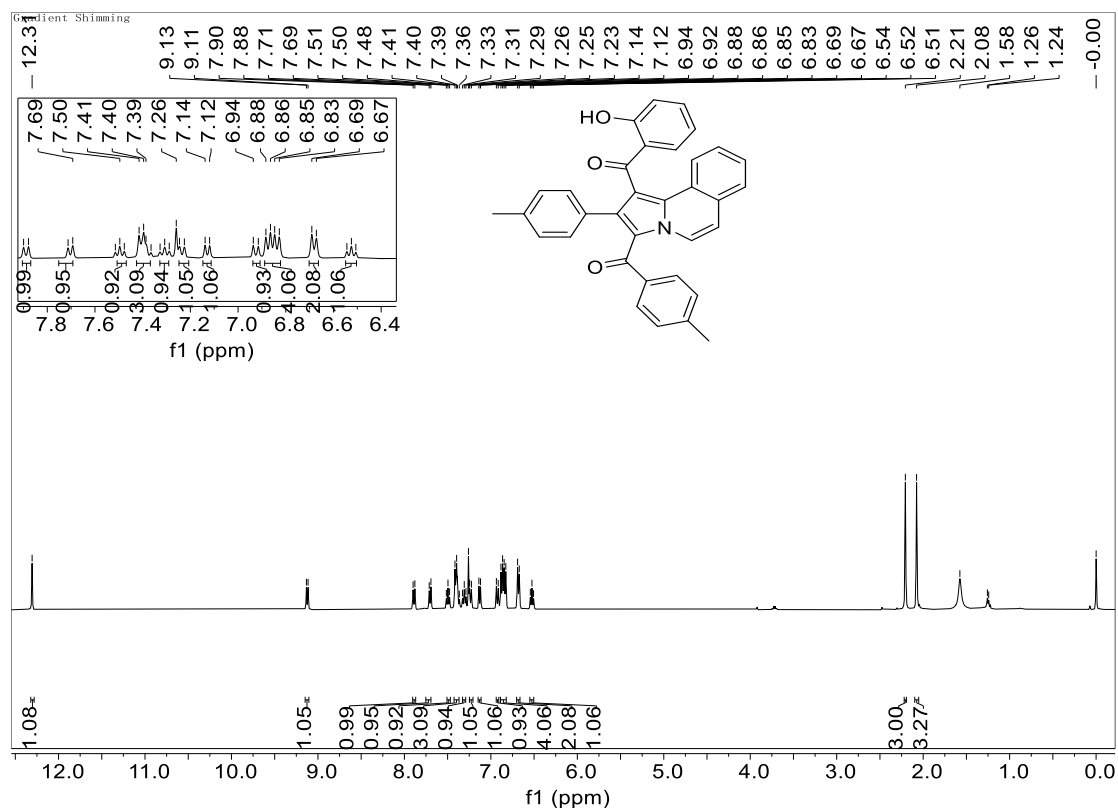

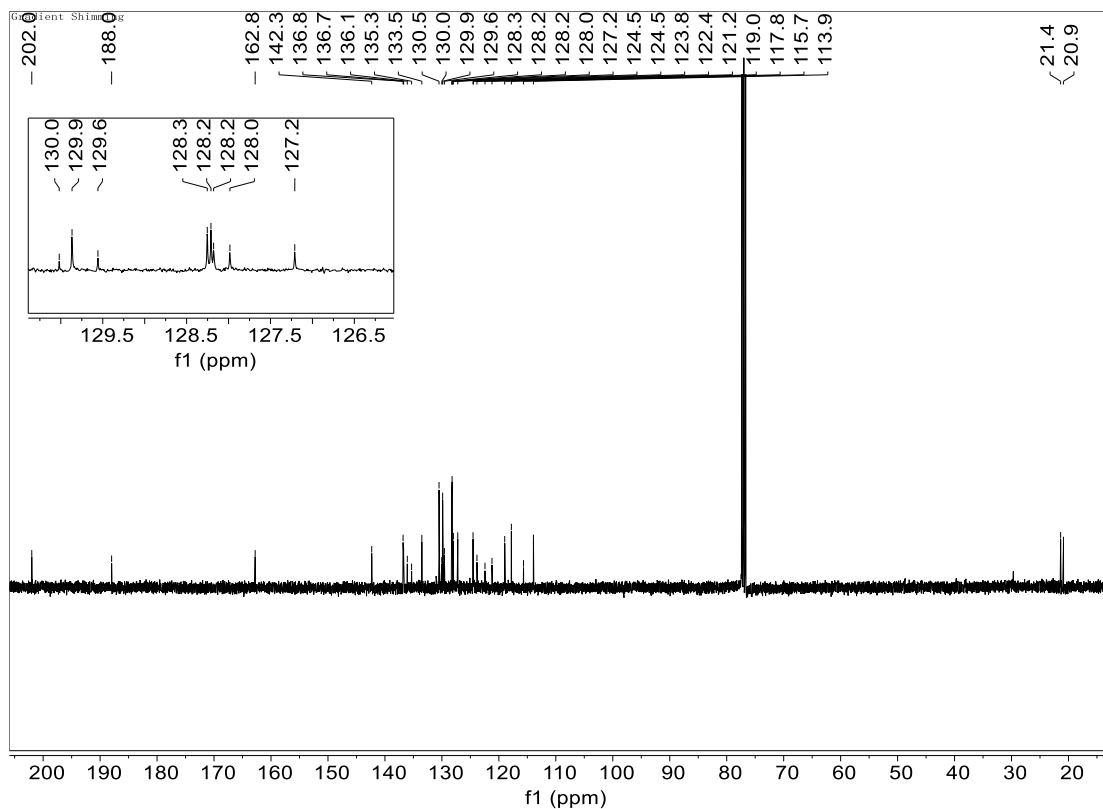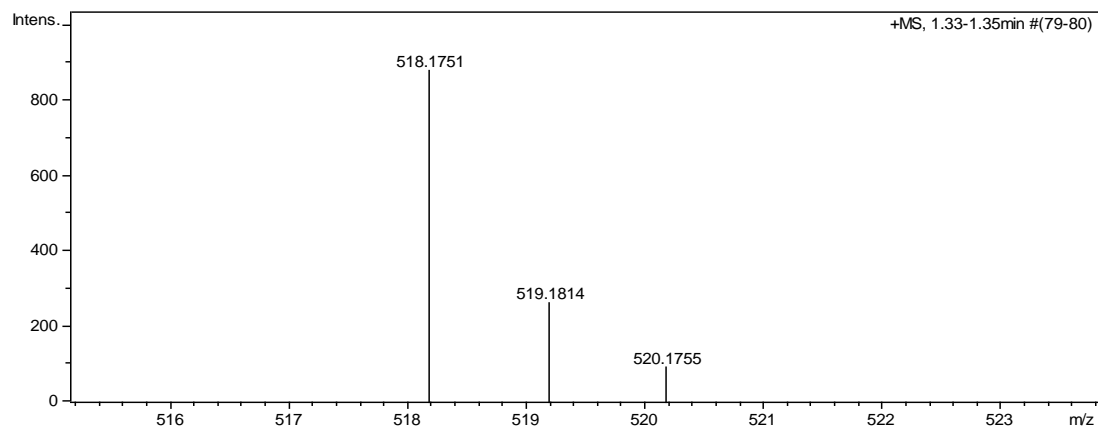

Supplement: d1nj03772b1.pdf [file d1nj03772b1.pdf]
